# Supplementary material for: Construction of oxygen-bridged multimetallic assembly: dual catalysts for hydroamination reactions
Source: Royal Society of Chemistry journal article supplement (doi:10.1039/c2ra21778c), 2012-10-30
Supplement: c2ra21778c.pdf [file c2ra21778c.pdf]

## Supporting Information

### **Construction of Oxygen-bridged Multimetallic Assembly: Dual Catalysts for Hydroamination Reactions**

**Arup Mukherjee, Tamal K. Sen, Swadhin K. Mandal\*, Bholanath Maity and Debasis Koley**

Department of Chemical Sciences, Indian Institute of Science Education and Research-Kolkata,  
Mohanpur -741252, India

*E-mail:* swadhin.mandal@iiserkol.ac.in

$^1\text{H}$  NMR of  $[\text{Cp}^*_2(\text{Me})\text{Zr}(\mu\text{-O})\text{Zr}(\text{NMe}_2)_2(\mu\text{-O})\text{Zr}(\text{Me})\text{Cp}^*_2]$  (**2**).

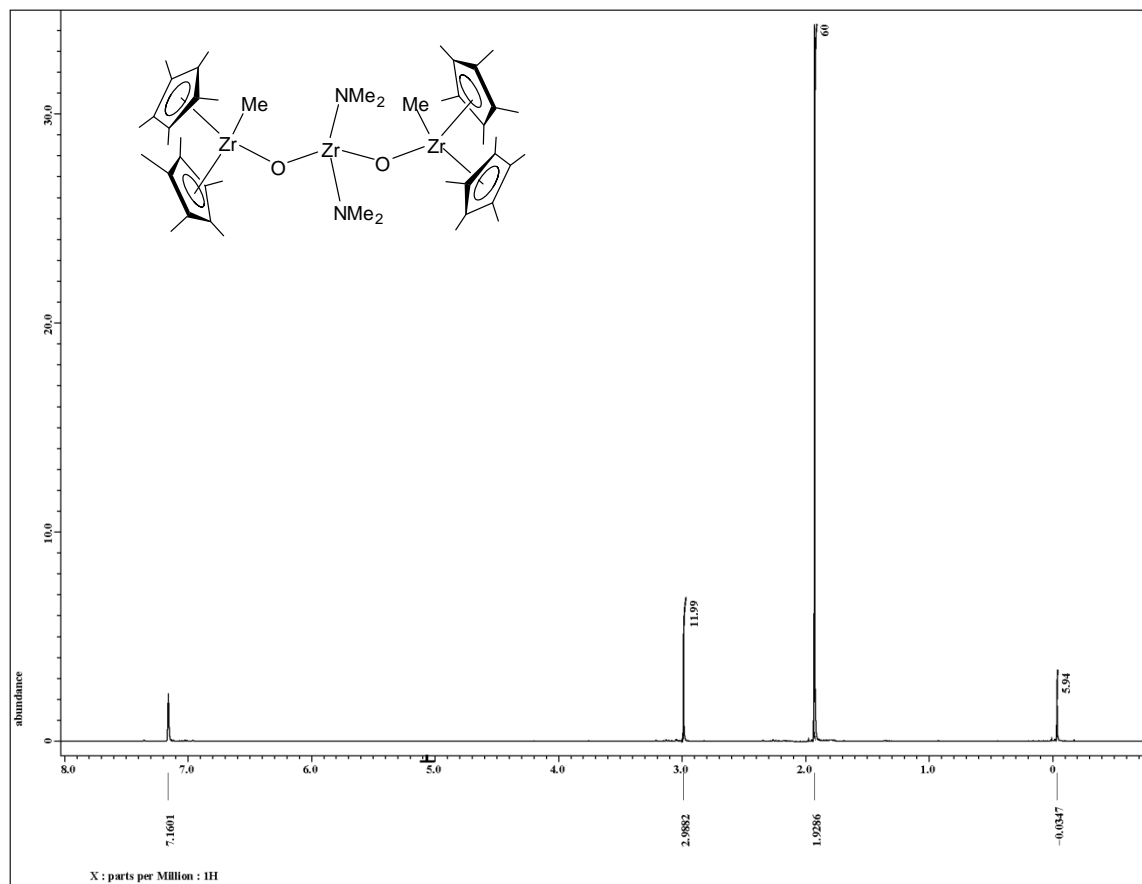

Fig. S1  $^1\text{H}$  NMR spectrum of complex **2** in  $\text{C}_6\text{D}_6$ .

$^{13}\text{C}$  NMR of  $[\text{Cp}^*_2(\text{Me})\text{Zr}(\mu\text{-O})\text{Zr}(\text{NMe}_2)_2(\mu\text{-O})\text{Zr}(\text{Me})\text{Cp}^*_2]$  (**2**).

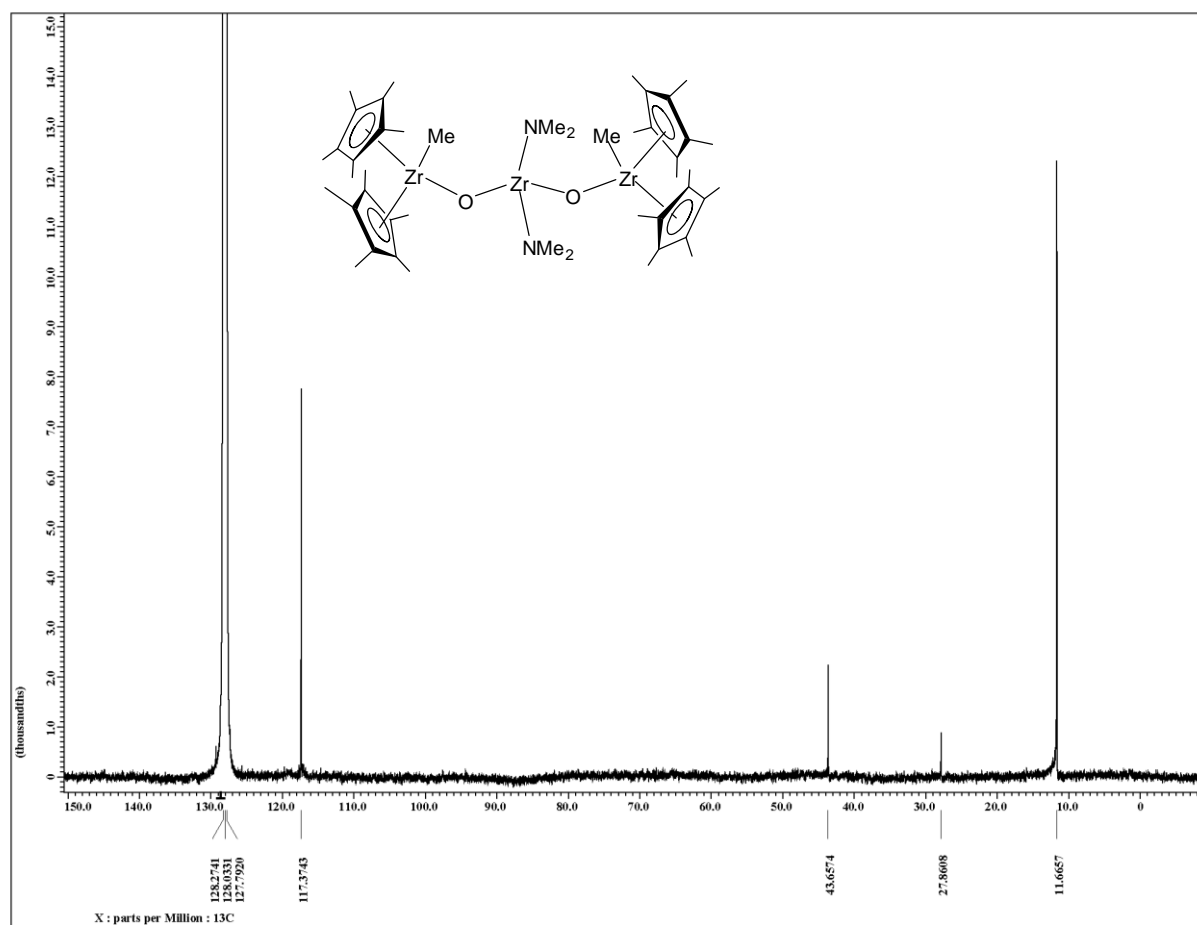

**Fig. S2**  $^{13}\text{C}$  NMR spectrum of complex **2** in  $\text{C}_6\text{D}_6$ .

$^1\text{H}$  NMR of  $[\text{PhNMe}_2\text{H}][\text{B}(\text{C}_6\text{F}_5)_4]$ .

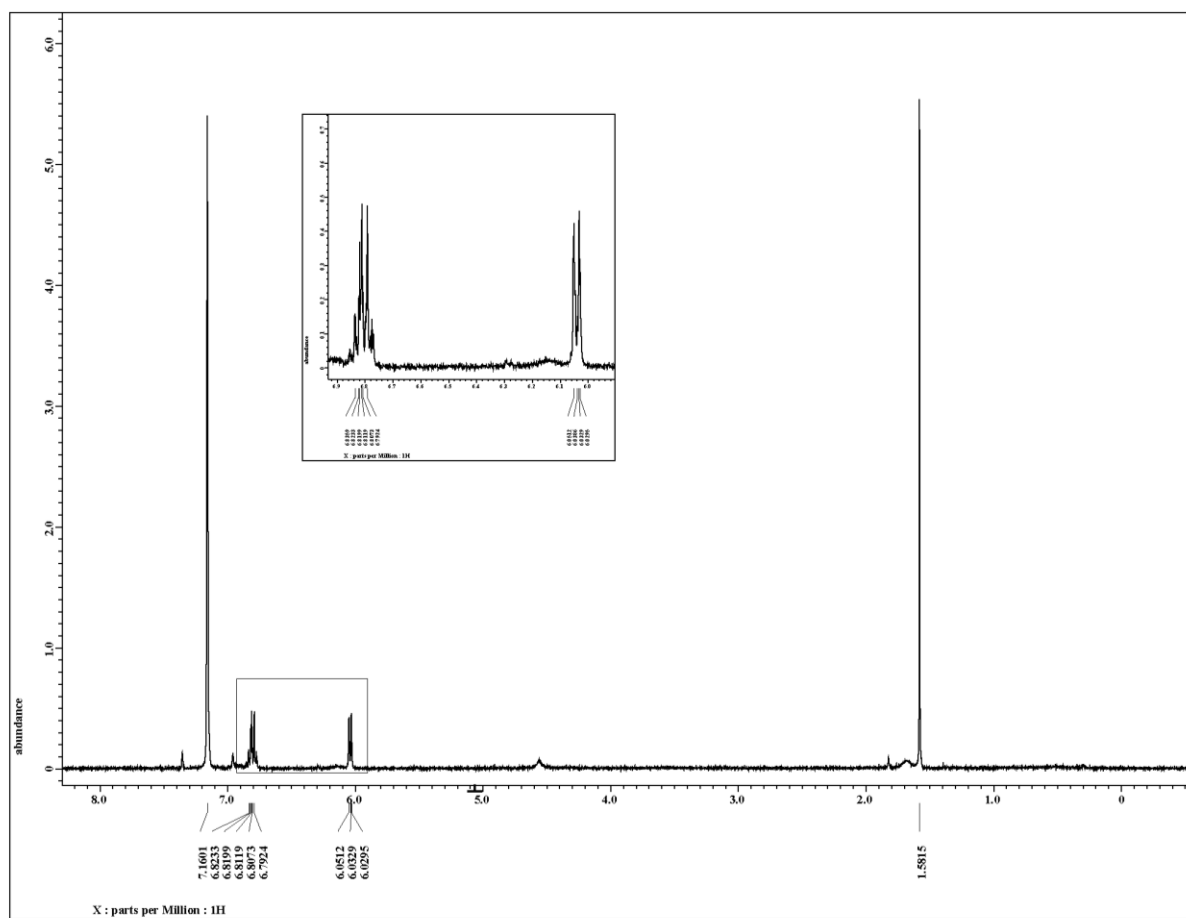

Fig. S3  $^1\text{H}$  NMR spectrum of  $[\text{PhNMe}_2\text{H}][\text{B}(\text{C}_6\text{F}_5)_4]$  in  $\text{C}_6\text{D}_6$ .

$^1\text{H}$  NMR of  $[\text{Cp}^*_2(\text{Me})\text{Zr}(\mu\text{-O})\text{Zr}(\text{NMe}_2)_2(\mu\text{-O})\text{Zr}(\text{Me})\text{Cp}^*_2]$  (**2**) + 1 equivalent of  $[\text{PhNMe}_2\text{H}][\text{B}(\text{C}_6\text{F}_5)_4]$ .

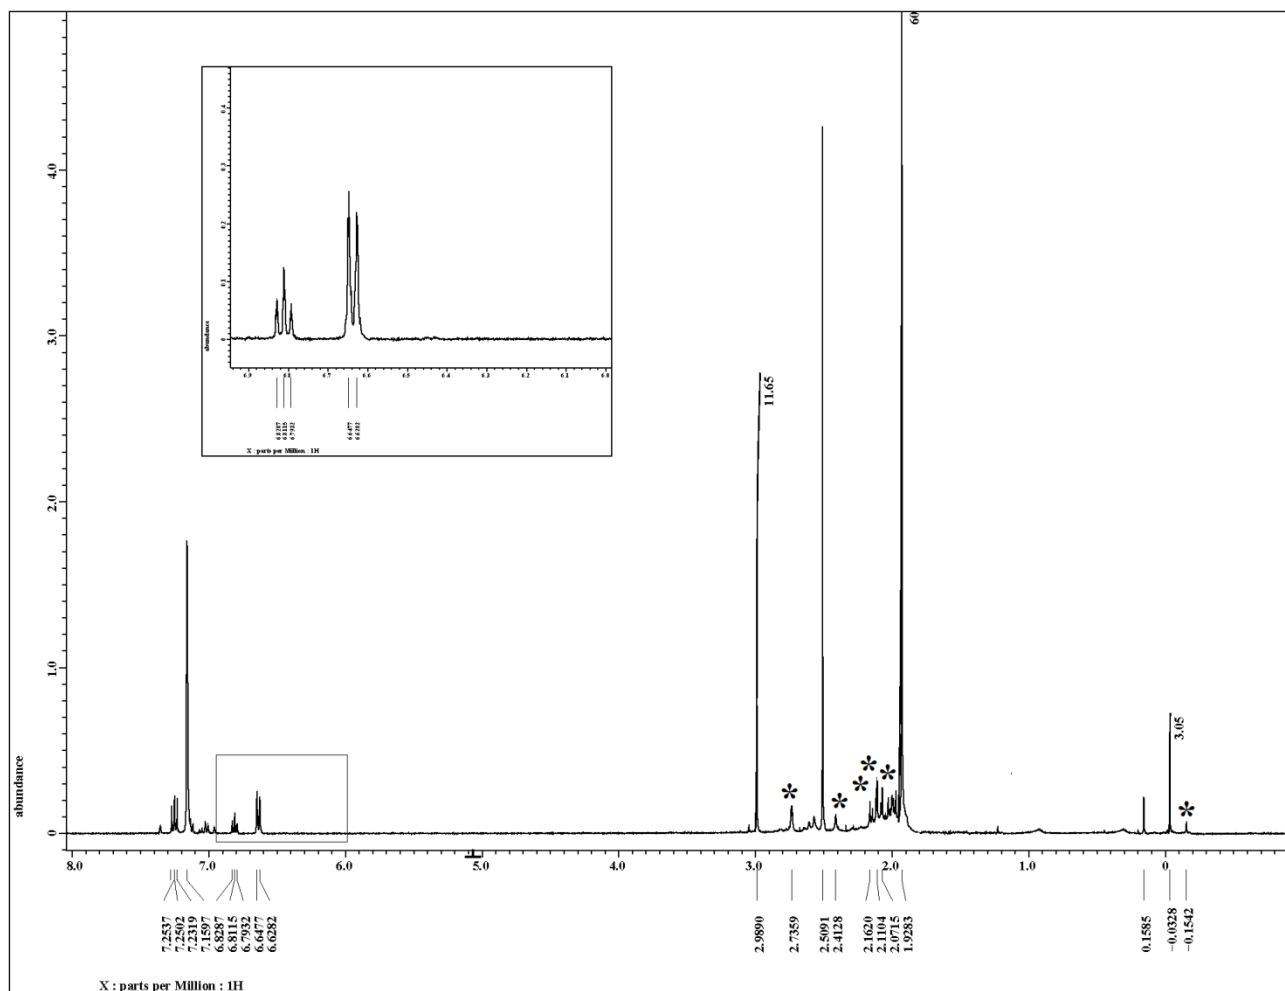

**Fig. S4**  $^1\text{H}$  NMR spectrum of complex **2** and one equivalent of the activator  $[\text{PhNMe}_2\text{H}][\text{B}(\text{C}_6\text{F}_5)_4]$  in  $\text{C}_6\text{D}_6$ . \* are the unidentified products of the reaction mixture.

$^1\text{H}$  NMR of  $[\text{Cp}^*_2(\text{Me})\text{Zr}(\mu\text{-O})\text{Zr}(\text{NMe}_2)_2(\mu\text{-O})\text{Zr}(\text{Me})\text{Cp}^*_2]$  (**2**) + 2 equivalent of  
 $[\text{PhNMe}_2\text{H}][\text{B}(\text{C}_6\text{F}_5)_4]$ .

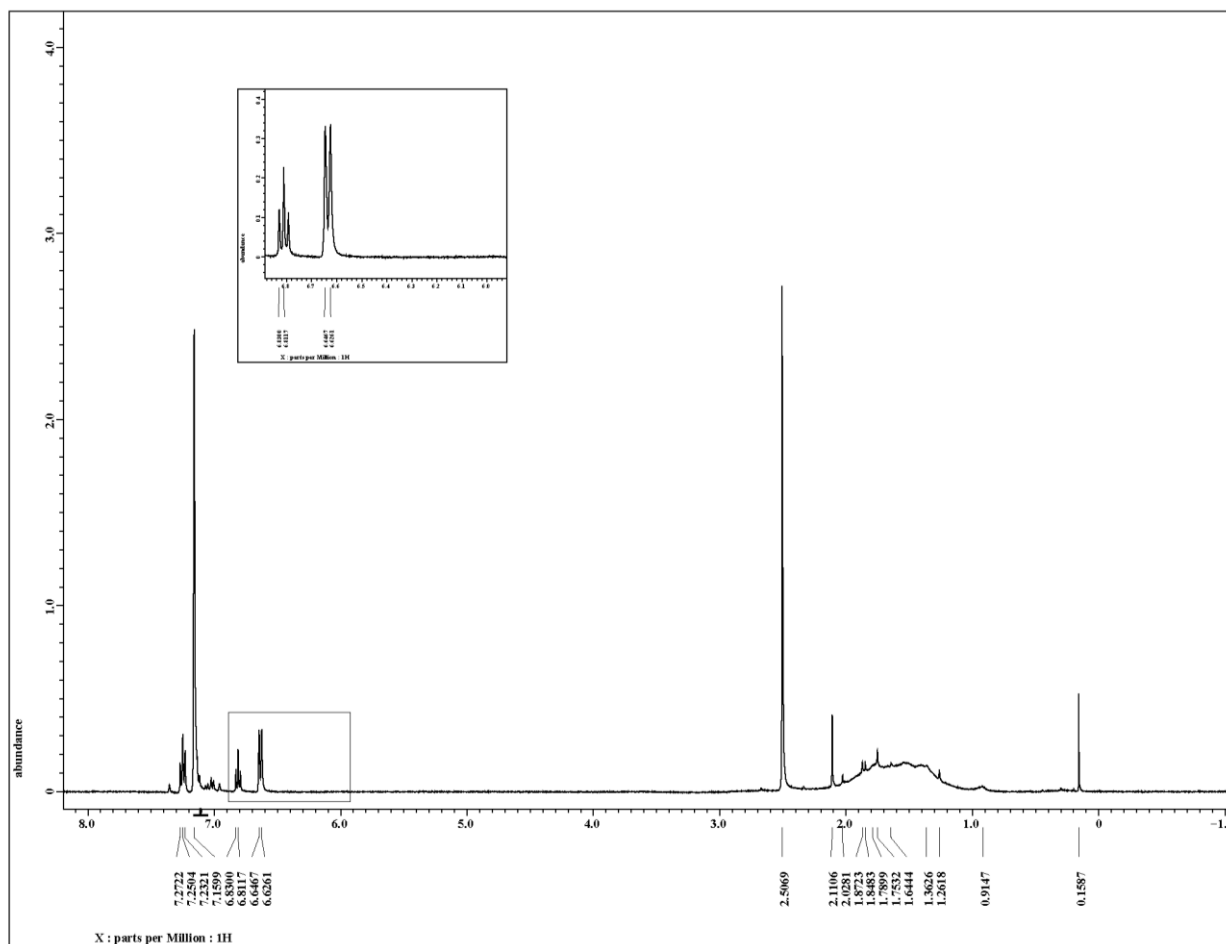

**Fig. S5**  $^1\text{H}$  NMR spectrum of complex **2** and two equivalent of the activator  $[\text{PhNMe}_2\text{H}][\text{B}(\text{C}_6\text{F}_5)_4]$  in  $\text{C}_6\text{D}_6$ .

## Computational results.

NBO analysis of the optimized structures showing corresponding charges on the different atoms.

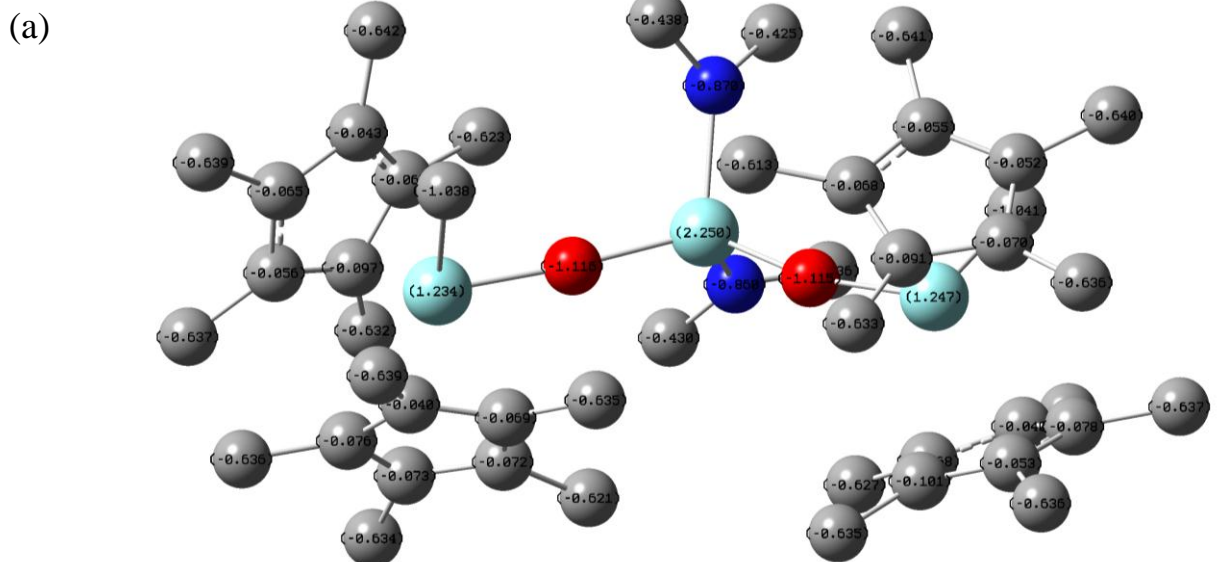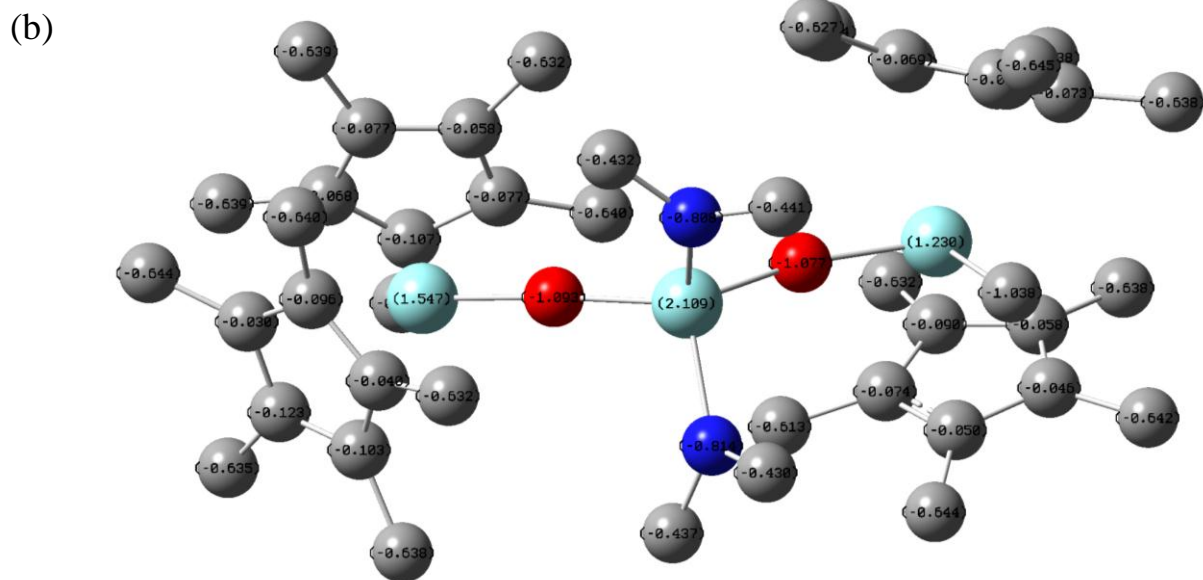

(c)

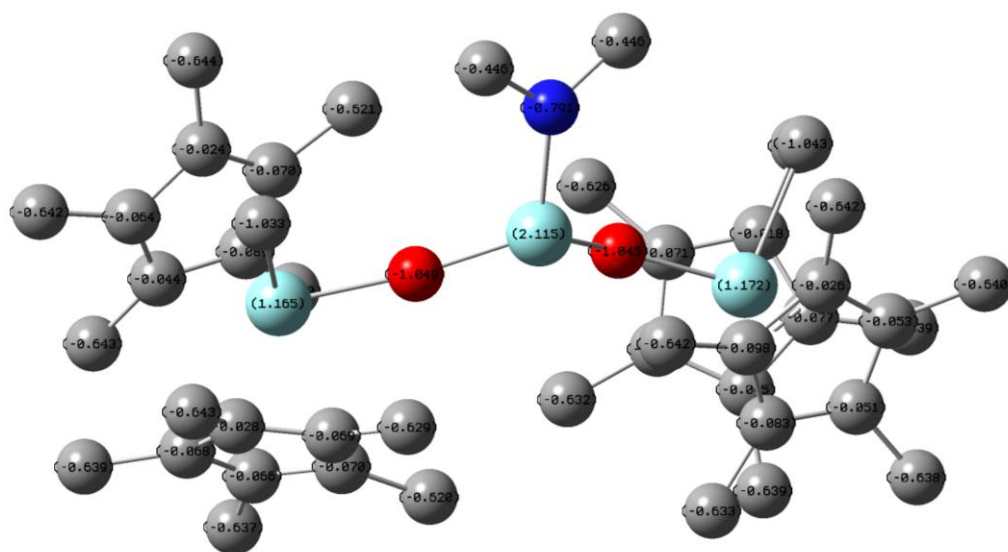

(2b)

(d)

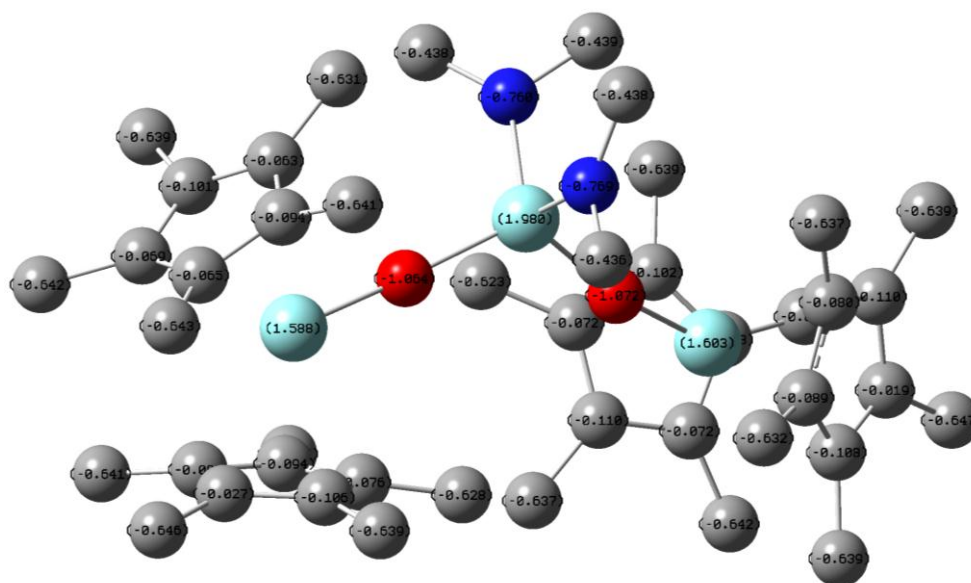

(2c)



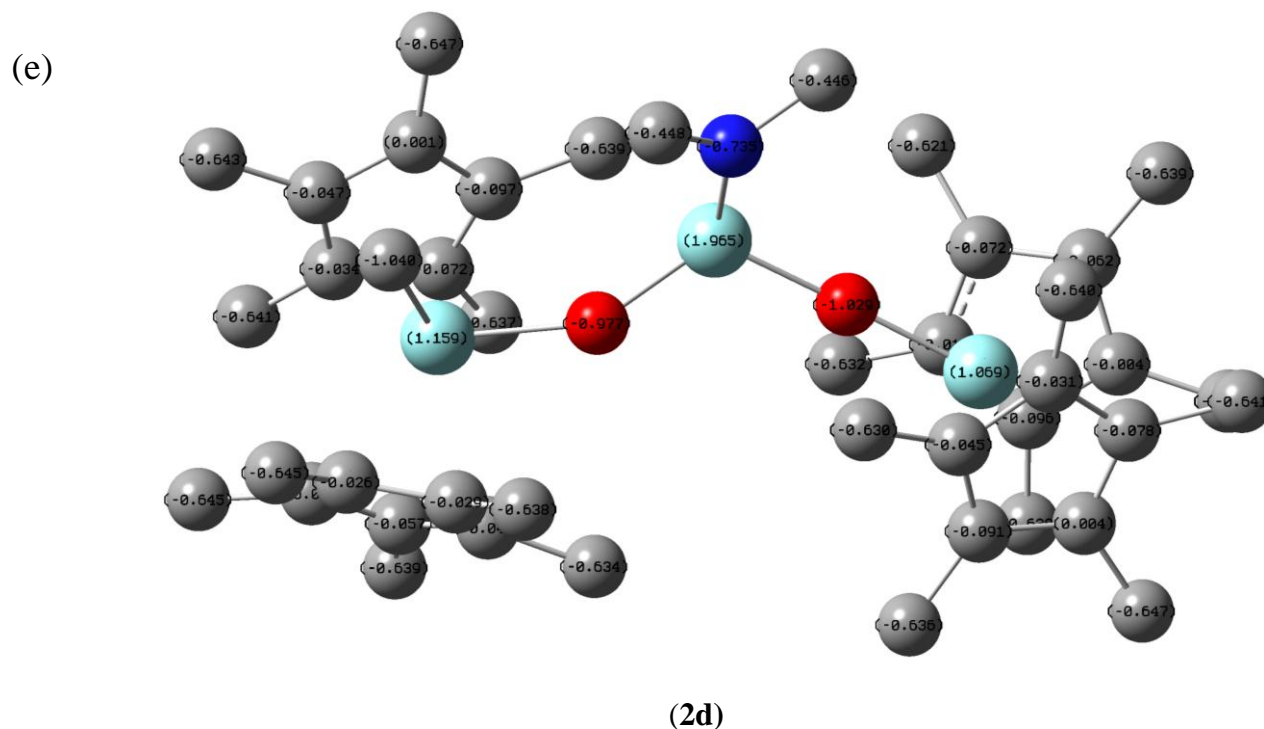

**Fig. S6** Electronic charge on the different atoms of the optimized structure: (a) complex **2**; (b) cation at one of the terminal zirconium center (**2a**); (c) cation at the terminal zirconium center (**2b**); (d) cations at both the terminal zirconium centers (**2c**); (e) cations at one of the terminal zirconium center and one of the central zirconium center (**2d**). Counterions and hydrogens are not shown for the sake of clarity.

### Control Experiments:

We carried out a set of control experiments to see the cooperative effect. We utilized following compounds to carry out these control experiments:  $\text{Cp}^*_2\text{Zr}(\text{Me})\text{OH}$ ,  $\text{Zr}(\text{NMe}_2)_4$ . We have particularly chosen  $\text{Cp}^*_2\text{Zr}(\text{Me})\text{OH}$  and  $\text{Zr}(\text{NMe}_2)_4$  for our control experiments since they are assembled in the trimetallic zirconium catalyst  $[\text{Cp}^*_2(\text{Me})\text{Zr}(\mu\text{-O})\text{Zr}(\text{NMe}_2)_2(\mu\text{-O})\text{Zr}(\text{Me})\text{Cp}^*_2]$  (**2**). The catalytic results of control experiment indicates that  $[\text{Cp}^*_2(\text{Me})\text{Zr}(\mu\text{-O})\text{Zr}(\text{NMe}_2)_2(\mu\text{-O})\text{Zr}(\text{Me})\text{Cp}^*_2]$  (**2**) is comparatively less active catalyst for hydroamination of secondary aminoalkene substrate than  $\text{Cp}^*_2\text{Zr}(\text{Me})\text{OH}$  under identical reaction condition (see entries 1 and

2, Table S1). Similarly,  $[\text{Cp}^*_2(\text{Me})\text{Zr}(\mu\text{-O})\text{Zr}(\text{NMe}_2)_2(\mu\text{-O})\text{Zr}(\text{Me})\text{Cp}^*_2]$  (**2**) also shows less activity than the  $\text{Zr}(\text{NMe}_2)_4$  for intermolecular hydroamination reaction under identical reaction condition (see entries 3 and 4, Table S1).

**Table S1.** Control experiments carried out for the hydroamination catalysis reaction.<sup>a</sup>

| Entry | Cat. (mol%)                                                                                                                                      | Sub.                                                                                | Product                                                                             | Temp (°C) | Time | Conv. (%)       |
|-------|--------------------------------------------------------------------------------------------------------------------------------------------------|-------------------------------------------------------------------------------------|-------------------------------------------------------------------------------------|-----------|------|-----------------|
| 1     | $\text{Cp}^*_2\text{Zr}(\text{Me})\text{OH}$<br>(10)                                                                                             | 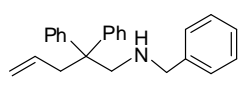   |    | 110 °C    | 10 h | 65 <sup>b</sup> |
| 2     | $[\text{Cp}^*_2(\text{Me})\text{Zr}(\mu\text{-O})\text{Zr}(\text{NMe}_2)_2(\mu\text{-O})\text{Zr}(\text{Me})\text{Cp}^*_2]$<br>( <b>2</b> )(10)  |    |    | 110 °C    | 10 h | 35 <sup>b</sup> |
| 3     | $\text{Zr}(\text{NMe}_2)_4$ (10)                                                                                                                 |   |   | 110°C     | 8 h  | 99              |
| 4     | $[\text{Cp}^*_2(\text{Me})\text{Zr}(\mu\text{-O})\text{Zr}(\text{NMe}_2)_2(\mu\text{-O})\text{Zr}(\text{Me})\text{Cp}^*_2]$ ( <b>2</b> )<br>(10) |  |  | 110 °C    | 12 h | 91              |

<sup>a</sup>The solvent used was  $\text{C}_6\text{D}_6$  and the conversion was reported based on  $^1\text{H}$  NMR spectroscopy of the reaction medium. <sup>b</sup> In this case 10 mol% of the activator  $[\text{PhNMe}_2\text{H}][\text{B}(\text{C}_6\text{F}_5)_4]$  was used into the catalyst solution.

### Kinetic Study for the Hydroamination of Carbodiimides (**4**) and *p*-toluidine (**5**) Using Catalyst **2**:

We carried out detailed kinetic studies of the hydroamination process of carbodiimides catalyzed by **2** using the *N,N'*-dicyclohexylcarbodiimide (**4**) and *p*-toluidine (**5**) in  $\text{C}_6\text{D}_6$ . Kinetic studies for the formation of *N,N',N''*-trisubstituted guanidine (**6**) were carried out with catalyst **2** and equi-molar amounts of **4** and **5** via  $^1\text{H}$  NMR spectroscopy. The evolution of the specific

resonances of **6** was monitored by  $^1\text{H}$  NMR spectroscopy relative to an internal standard (hexamethyl benzene) over the course of the first 7 h. Previous study by Marks and co-workers has shown that the rate equation of the lanthanide-catalyzed intermolecular hydroamination of alkyne and amine derivatives can be summarized as shown in eq 1.<sup>S1</sup>

$$\text{rate} = k[\text{amine}]^0[\text{alkyne}]^1[\text{catalyst}]^1 \quad (1)$$

In the present case, we first determined the order of the reaction with respect to amine concentration by keeping the concentration of other components virtually unaltered. Initially, we began our study with 8.12 mM catalyst (**2**) concentration, and the carbodiimide to amine molar ratio was maintained at more than 10:1. The excess carbodiimide concentration maintains approximately zero-order condition. The amine to catalyst ratio was maintained at 10:1 during this study. In this experiment we observed that a plot of  $\ln(C/C_0)$  versus time provides a linear plot with negative slope. This confirms the first order rate dependence of the reaction with respect to amine concentration (Fig. 7a).<sup>S2</sup>

Next, we determined the order of the reaction with respect to the concentration of carbodiimide. During this study we maintained the relative carbodiimide to amine ratio over 1:10. The catalyst: carbodiimide ratio was maintained to 1:10. This study provided evidence of a first-order dependence of the reaction rate on carbodiimide concentration as well. Fig. 7b reveals that with increasing concentration of carbodiimide the rate of reaction increases in a linear fashion.

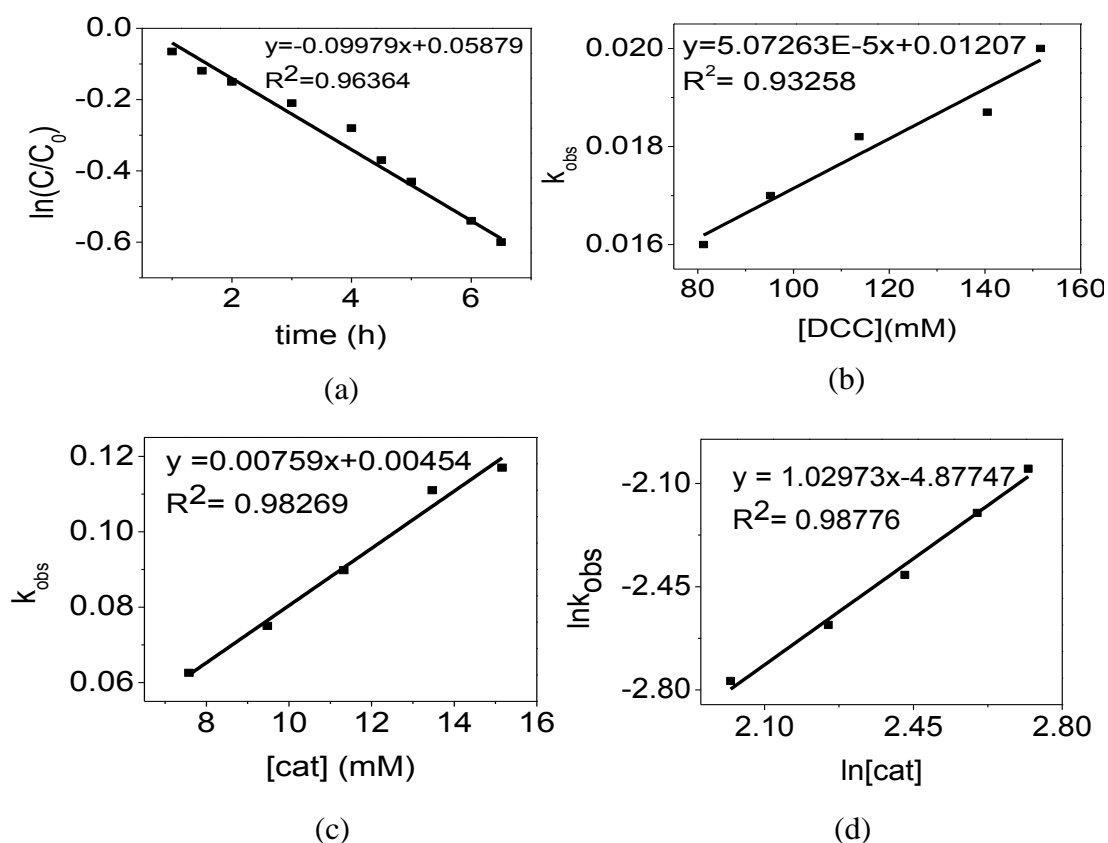

**Fig. 7** Kinetic studies on the hydroamination of the carbodiimide for the formation of the guanidine (**6**) monitored by  $^1\text{H}$  NMR spectroscopy in  $\text{C}_6\text{D}_6$  at  $110\text{ }^\circ\text{C}$ : (a) plot of  $\ln(C/C_0)$  versus time; (b) plot of  $k_{\text{obs}}$  and carbodiimide concentration for the formation of **6**, (c) plot of reaction rate versus concentration of the catalyst and (d) van't Hoff plot for the formation of **6**.

The similar observation was also noted by Marks and co-workers as well as by Hill and co-workers previously in the case of intermolecular hydroamination reaction.<sup>S1,S2</sup> The dependence of the rate of reaction with respect to catalyst concentration was studied by gradually changing the concentration of catalyst (from 7.6 mM to 15.4 mM) and holding the amine (151.6 mM) and carbodiimide (151.6 mM) concentrations fixed. A plot of reaction rate versus catalyst concentration reveals a linear increase of the reaction rate with catalyst concentration (Fig. 7c). This first order rate of the reaction with respect to the catalyst concentration was further confirmed from van't Hoff plot.<sup>S3</sup> A plot of  $\ln k_{\text{obs}}$  versus  $\ln[\text{catalyst}]$  provided a linear graph (Fig. 7d) and the value of the slope was determined to be 1.03 (slope = order of the reaction).<sup>S3</sup>

Thus, from the present study the overall rate law for the intermolecular hydroamination reaction of carbodiimides and amine catalyzed by **2** can be summarized as shown in eq 2.

$$\text{rate} = k[\text{amine}]^1[\text{carbodiimide}]^1[\text{catalyst}]^1 \quad (2)$$

**Kinetic Isotope Effect.** We studied kinetic isotope effect by deuterium substitution of the NH<sub>2</sub> group present in *p*-toluidine to understand the role of NH<sub>2</sub> group in the catalytic process.

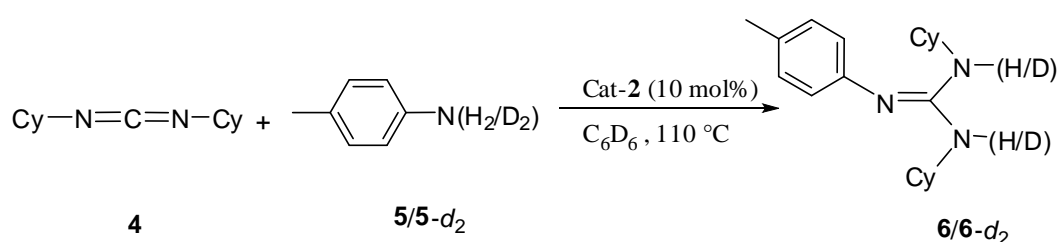

**Scheme S1** Catalytic reaction of dicyclohexyl carbodiimide (**4**) and *p*-toluidine (**5**) and *p*-toluidine-*d*<sub>2</sub> (**5-d<sub>2</sub>**) with **2** as catalyst at 110 °C keeping the concentration of carbodiimide as 151.56 mM, concentration of the amine as 151.56 mM and the concentration of catalyst as 15.2 mM.

Determination of the kinetic isotope effect (KIE) has proven to be a very useful mechanistic tool, which has already been applied in many organometallic systems.<sup>S4</sup> We carried out the H/D kinetic isotope effect (KIE) experiment using **5** and **5-d<sub>2</sub>** using catalyst **2** in C<sub>6</sub>D<sub>6</sub> (Scheme S1) under the identical reaction condition. The first order plots of the reaction of **5** and **5-d<sub>2</sub>** under the reaction condition indicate  $k_{\text{obs}} = 0.117 \text{ h}^{-1}$  and  $k_{\text{obs}} = 0.058 \text{ h}^{-1}$ , respectively, which translates into a primary KIE of 2.02 (Fig. 8). These observations suggest that H/D derived from the -NH<sub>2</sub>/-ND<sub>2</sub> moiety of **5/5-d<sub>2</sub>** is involved in one of the key steps of the hydroamination of carbodiimides.

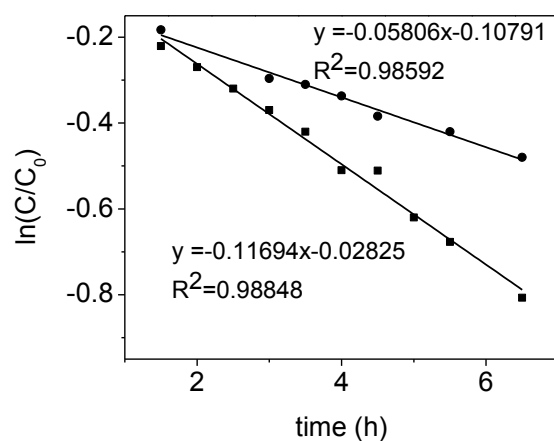

**Fig. 8** H/D KIE for the formation of **6** and **6-d<sub>2</sub>** using catalyst **2** at 110 °C

### X-ray Crystallographic Details of **2**:

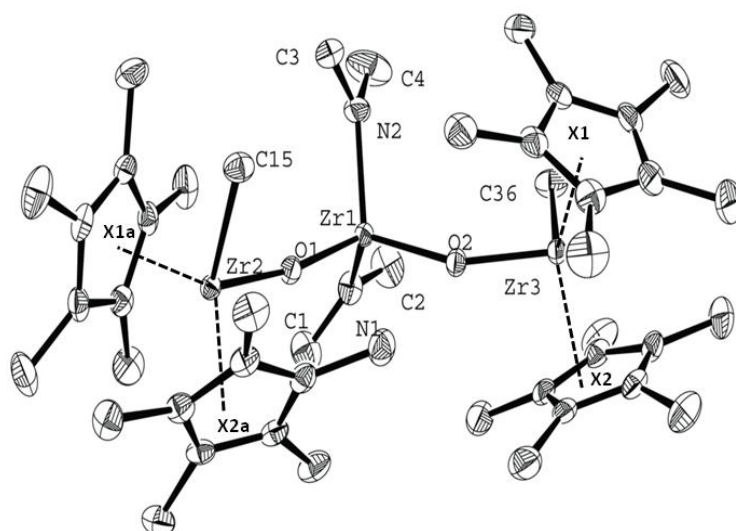

**Fig. S9.** Molecular structure of complex **2**. Thermal ellipsoids are drawn with 50% probability level. Hydrogen atoms have been omitted for clarity. x = centroid of Cp\* ring.

**Table S2.** Crystal data and structure refinement for **2**

|                   |                                                                               |
|-------------------|-------------------------------------------------------------------------------|
| Empirical formula | C <sub>46</sub> H <sub>78</sub> N <sub>2</sub> O <sub>2</sub> Zr <sub>3</sub> |
| Formula weight    | 967.79                                                                        |
| Temperature       | 100(2) K                                                                      |
| Wavelength        | 0.71073 Å                                                                     |

|                                      |                                                                                                                                                                               |
|--------------------------------------|-------------------------------------------------------------------------------------------------------------------------------------------------------------------------------|
| Crystal system, space group          | monoclinic, $P2_1/n$                                                                                                                                                          |
| Unit cell dimensions                 | $a = 14.8729(16) \text{ \AA}$<br>$b = 18.838(2) \text{ \AA}$<br>$c = 17.819(2) \text{ \AA}$<br>$\alpha = 90.00^\circ$<br>$\beta = 111.125(2)^\circ$<br>$\gamma = 90.00^\circ$ |
| Volume                               | $4657.1(9) \text{ \AA}^3$                                                                                                                                                     |
| Z, Calculated density                | 4, $1.380 \text{ g/mm}^3$                                                                                                                                                     |
| Absorption coefficient               | $0.696 \text{ mm}^{-1}$                                                                                                                                                       |
| F(000)                               | 2028                                                                                                                                                                          |
| Crystal size                         | $0.20 \times 0.13 \times 0.10 \text{ mm}^3$                                                                                                                                   |
| Theta range for data collection      | $2.45\text{-}27.85^\circ$                                                                                                                                                     |
| Limiting indices                     | $-18 \leq h \leq 18, -24 \leq k \leq 22, -22 \leq l \leq 22$                                                                                                                  |
| Reflections collected / unique       | 79448 / 10155                                                                                                                                                                 |
| Refinement method                    | Full-matrix least-squares on $F^2$                                                                                                                                            |
| Goodness-of-fit on $F^2$             | 1.087                                                                                                                                                                         |
| Final R indices [ $I > 2\sigma(I)$ ] | $R1 = 0.0238, wR2 = 0.0617$                                                                                                                                                   |
| R indices (all data)                 | $R1 = 0.0309, wR2 = 0.0664$                                                                                                                                                   |
| Largest diff. peak and hole          | 0.483 and $-0.930 \text{ e. \AA}^{-3}$                                                                                                                                        |

---

Table S3 - Final Coordinates and Equivalent Isotropic

Displacement Parameters of the non-Hydrogen atoms for **2**:

| Atom | x             | y            | z            | U(eq) [Ang <sup>2</sup> ] |
|------|---------------|--------------|--------------|---------------------------|
| Zr1  | 0.02669 (1)   | 0.88933 (1)  | 0.76696 (1)  | 0.0158 (1)                |
| Zr2  | -0.09889 (1)  | 0.73339 (1)  | 0.83741 (1)  | 0.0152 (1)                |
| Zr3  | 0.28596 (1)   | 0.88854 (1)  | 0.77133 (1)  | 0.0167 (1)                |
| O1   | -0.03907 (9)  | 0.80894 (7)  | 0.79211 (8)  | 0.0197 (4)                |
| O2   | 0.15653 (9)   | 0.86319 (7)  | 0.76926 (8)  | 0.0197 (4)                |
| N1   | -0.05582 (12) | 0.92805 (10) | 0.65541 (10) | 0.0264 (5)                |
| N2   | 0.03874 (13)  | 0.96891 (10) | 0.84949 (11) | 0.0297 (6)                |
| C1   | -0.13901 (18) | 0.89410 (14) | 0.59718 (15) | 0.0408 (8)                |
| C2   | -0.0336 (2)   | 0.99372 (14) | 0.62348 (16) | 0.0443 (8)                |
| C3   | 0.04565 (19)  | 0.95226 (16) | 0.93056 (15) | 0.0462 (9)                |
| C4   | 0.0309 (2)    | 1.04497 (14) | 0.83625 (19) | 0.0593 (10)               |
| C5   | -0.20323 (14) | 0.81087 (12) | 0.89532 (13) | 0.0258 (6)                |
| C6   | -0.22483 (14) | 0.83276 (10) | 0.81529 (13) | 0.0237 (6)                |
| C7   | -0.21146 (17) | 0.90610 (12) | 0.78912 (17) | 0.0373 (8)                |
| C8   | -0.27046 (14) | 0.77562 (11) | 0.76383 (12) | 0.0232 (6)                |
| C9   | -0.27985 (14) | 0.71894 (11) | 0.81348 (13) | 0.0248 (6)                |
| C10  | -0.34489 (17) | 0.65579 (13) | 0.78464 (18) | 0.0421 (8)                |
| C11  | -0.23608 (15) | 0.74006 (12) | 0.89395 (13) | 0.0263 (6)                |
| C12  | -0.2368 (2)   | 0.69843 (16) | 0.96574 (16) | 0.0472 (9)                |
| C13  | -0.31349 (17) | 0.77991 (15) | 0.67343 (14) | 0.0385 (8)                |
| C14  | -0.16791 (18) | 0.85639 (15) | 0.96931 (16) | 0.0443 (9)                |
| C15  | 0.00110 (15)  | 0.75064 (11) | 0.96802 (12) | 0.0259 (6)                |
| C16  | -0.12341 (15) | 0.61939 (10) | 0.75197 (12) | 0.0224 (6)                |
| C17  | -0.04318 (15) | 0.65590 (10) | 0.74578 (12) | 0.0226 (6)                |
| C18  | 0.03243 (14)  | 0.65347 (10) | 0.82185 (12) | 0.0222 (6)                |
| C19  | -0.00181 (15) | 0.61618 (10) | 0.87543 (12) | 0.0224 (6)                |



Table S4 - Hydrogen Atom Positions and Isotropic Displacement Parameters  
for **2**:

| Atom | x        | y       | z       | U(iso) [Ang <sup>2</sup> ] |
|------|----------|---------|---------|----------------------------|
| H1C  | -0.19410 | 0.92460 | 0.58550 | 0.0610                     |
| H1D  | -0.15130 | 0.85000 | 0.61870 | 0.0610                     |
| H1E  | -0.12680 | 0.88520 | 0.54870 | 0.0610                     |
| H2C  | -0.02400 | 0.98430 | 0.57400 | 0.0660                     |
| H2D  | 0.02410  | 1.01400 | 0.66160 | 0.0660                     |
| H2E  | -0.08610 | 1.02640 | 0.61370 | 0.0660                     |
| H3A  | 0.10350  | 0.97270 | 0.96820 | 0.0690                     |
| H3B  | 0.04740  | 0.90170 | 0.93750 | 0.0690                     |
| H3C  | -0.00930 | 0.97130 | 0.93990 | 0.0690                     |
| H4A  | -0.02230 | 1.06290 | 0.84900 | 0.0890                     |
| H4B  | 0.02040  | 1.05490 | 0.78090 | 0.0890                     |
| H4C  | 0.08930  | 1.06750 | 0.87010 | 0.0890                     |
| H7A  | -0.26690 | 0.93440 | 0.78460 | 0.0560                     |
| H7B  | -0.20390 | 0.90400 | 0.73790 | 0.0560                     |
| H7C  | -0.15500 | 0.92700 | 0.82810 | 0.0560                     |
| H10A | -0.31270 | 0.61400 | 0.81230 | 0.0630                     |
| H10B | -0.36040 | 0.64990 | 0.72780 | 0.0630                     |
| H10C | -0.40300 | 0.66310 | 0.79530 | 0.0630                     |
| H12A | -0.27550 | 0.72280 | 0.99060 | 0.0710                     |
| H12B | -0.17210 | 0.69380 | 1.00370 | 0.0710                     |
| H12C | -0.26330 | 0.65210 | 0.94870 | 0.0710                     |
| H13A | -0.34400 | 0.82520 | 0.65770 | 0.0580                     |
| H13B | -0.36040 | 0.74290 | 0.65320 | 0.0580                     |
| H13C | -0.26350 | 0.77440 | 0.65170 | 0.0580                     |
| H14A | -0.12650 | 0.89290 | 0.96230 | 0.0670                     |
| H14B | -0.13270 | 0.82770 | 1.01490 | 0.0670                     |

|      |          |         |         |        |
|------|----------|---------|---------|--------|
| H14C | -0.22190 | 0.87780 | 0.97800 | 0.0670 |
| H15A | 0.06620  | 0.73980 | 0.97340 | 0.0390 |
| H15B | -0.01820 | 0.72010 | 1.00260 | 0.0390 |
| H15C | -0.00280 | 0.79920 | 0.98280 | 0.0390 |
| H16  | -0.15370 | 0.66280 | 0.76170 | 0.0270 |
| H21A | -0.11520 | 0.50060 | 0.88140 | 0.0450 |
| H21B | -0.21330 | 0.53370 | 0.82560 | 0.0450 |
| H21C | -0.16020 | 0.56450 | 0.91210 | 0.0450 |
| H22A | 0.01830  | 0.59700 | 0.99280 | 0.0460 |
| H22B | 0.11310  | 0.62130 | 0.98090 | 0.0460 |
| H22C | 0.07470  | 0.54360 | 0.95860 | 0.0460 |
| H23A | 0.16370  | 0.68660 | 0.89780 | 0.0450 |
| H23B | 0.12970  | 0.72650 | 0.81500 | 0.0450 |
| H23C | 0.16860  | 0.64860 | 0.82110 | 0.0450 |
| H24A | -0.02420 | 0.65220 | 0.63820 | 0.0480 |
| H24B | 0.01050  | 0.72410 | 0.68370 | 0.0480 |
| H24C | -0.09990 | 0.70950 | 0.63980 | 0.0480 |
| H25A | -0.24020 | 0.64000 | 0.65030 | 0.0490 |
| H25B | -0.25580 | 0.57380 | 0.69750 | 0.0490 |
| H25C | -0.19060 | 0.56760 | 0.64560 | 0.0490 |
| H27  | 0.36920  | 0.82370 | 0.74500 | 0.0310 |
| H28A | 0.44340  | 0.72800 | 0.67450 | 0.0610 |
| H28B | 0.43880  | 0.72980 | 0.76100 | 0.0610 |
| H28C | 0.50600  | 0.78290 | 0.73810 | 0.0610 |
| H30A | 0.16660  | 0.72280 | 0.67650 | 0.0680 |
| H30B | 0.27270  | 0.69580 | 0.71850 | 0.0680 |

---

Table S5 - (An)isotropic Displacement Parameters for **2**:

| Atom | U(1,1) or U | U(2,2)     | U(3,3)     | U(2,3)      | U(1,3)      | U(1,2)      |
|------|-------------|------------|------------|-------------|-------------|-------------|
| Zr1  | 0.0147(1)   | 0.0158(1)  | 0.0174(1)  | -0.0006(1)  | 0.0064(1)   | 0.0002(1)   |
| Zr2  | 0.0156(1)   | 0.0161(1)  | 0.0141(1)  | 0.0008(1)   | 0.0056(1)   | 0.0006(1)   |
| Zr3  | 0.0142(1)   | 0.0191(1)  | 0.0169(1)  | -0.0004(1)  | 0.0057(1)   | -0.0005(1)  |
| O1   | 0.0193(7)   | 0.0203(7)  | 0.0210(7)  | 0.0002(5)   | 0.0092(5)   | 0.0001(5)   |
| O2   | 0.0161(6)   | 0.0243(7)  | 0.0194(6)  | 0.0002(5)   | 0.0071(5)   | 0.0003(5)   |
| N1   | 0.0227(9)   | 0.0298(9)  | 0.0250(9)  | 0.0076(7)   | 0.0064(7)   | 0.0059(7)   |
| N2   | 0.0253(9)   | 0.0282(10) | 0.0350(10) | -0.0133(8)  | 0.0100(8)   | 0.0000(8)   |
| C1   | 0.0357(13)  | 0.0483(15) | 0.0313(12) | 0.0069(11)  | 0.0036(10)  | -0.0033(11) |
| C2   | 0.0474(15)  | 0.0372(14) | 0.0444(14) | 0.0151(11)  | 0.0118(12)  | 0.0015(12)  |
| C3   | 0.0443(15)  | 0.0612(17) | 0.0426(14) | -0.0271(13) | 0.0272(12)  | 0.0186(13)  |
| C4   | 0.0624(19)  | 0.0313(14) | 0.0627(19) | -0.0159(13) | -0.0034(15) | 0.0163(13)  |
| C5   | 0.0193(10)  | 0.0315(11) | 0.0297(11) | -0.0074(9)  | 0.0126(8)   | 0.0011(8)   |
| C6   | 0.0171(9)   | 0.0201(10) | 0.0361(11) | 0.0018(8)   | 0.0124(8)   | 0.0027(8)   |
| C7   | 0.0305(12)  | 0.0239(11) | 0.0623(16) | 0.0095(11)  | 0.0227(12)  | 0.0065(9)   |
| C8   | 0.0171(9)   | 0.0277(11) | 0.0236(10) | 0.0019(8)   | 0.0058(8)   | 0.0045(8)   |
| C9   | 0.0178(9)   | 0.0229(10) | 0.0356(11) | 0.0009(8)   | 0.0120(8)   | 0.0000(8)   |
| C10  | 0.0263(12)  | 0.0291(12) | 0.0719(18) | -0.0050(12) | 0.0190(12)  | 0.0078(10)  |
| C11  | 0.0223(10)  | 0.0335(11) | 0.0287(11) | 0.0063(9)   | 0.0158(9)   | 0.0044(9)   |
| C12  | 0.0494(16)  | 0.0609(18) | 0.0432(14) | 0.0181(13)  | 0.0310(13)  | 0.0049(14)  |
| C13  | 0.0280(12)  | 0.0539(16) | 0.0272(11) | 0.0028(11)  | 0.0023(9)   | 0.0077(11)  |
| C14  | 0.0354(13)  | 0.0566(17) | 0.0441(14) | -0.0240(13) | 0.0181(11)  | 0.0026(12)  |
| C15  | 0.0270(11)  | 0.0280(11) | 0.0193(9)  | -0.0011(8)  | 0.0044(8)   | 0.0049(9)   |
| C16  | 0.0306(11)  | 0.0146(9)  | 0.0229(10) | -0.0029(7)  | 0.0108(8)   | 0.0027(8)   |
| C17  | 0.0311(11)  | 0.0180(9)  | 0.0218(9)  | -0.0015(7)  | 0.0134(8)   | 0.0036(8)   |
| C18  | 0.0247(10)  | 0.0180(9)  | 0.0263(10) | -0.0003(8)  | 0.0122(8)   | 0.0047(8)   |
| C19  | 0.0282(11)  | 0.0176(9)  | 0.0224(10) | 0.0024(7)   | 0.0102(8)   | 0.0058(8)   |
| C20  | 0.0296(11)  | 0.0145(9)  | 0.0244(10) | 0.0018(7)   | 0.0116(8)   | 0.0029(8)   |

|     |             |             |             |              |             |              |
|-----|-------------|-------------|-------------|--------------|-------------|--------------|
| C21 | 0.0355 (12) | 0.0212 (10) | 0.0370 (12) | 0.0067 (9)   | 0.0169 (10) | 0.0016 (9)   |
| C22 | 0.0355 (12) | 0.0272 (11) | 0.0276 (11) | 0.0070 (9)   | 0.0082 (9)  | 0.0107 (9)   |
| C23 | 0.0266 (11) | 0.0267 (11) | 0.0398 (12) | -0.0009 (9)  | 0.0157 (10) | 0.0029 (9)   |
| C24 | 0.0483 (14) | 0.0273 (11) | 0.0266 (11) | 0.0012 (9)   | 0.0218 (10) | 0.0032 (10)  |
| C25 | 0.0381 (13) | 0.0298 (12) | 0.0268 (11) | -0.0066 (9)  | 0.0082 (10) | -0.0045 (10) |
| C26 | 0.0241 (10) | 0.0309 (11) | 0.0249 (10) | 0.0000 (8)   | 0.0151 (8)  | -0.0009 (8)  |
| C27 | 0.0286 (11) | 0.0312 (11) | 0.0227 (10) | -0.0014 (8)  | 0.0150 (8)  | 0.0050 (9)   |
| C28 | 0.0429 (14) | 0.0380 (14) | 0.0471 (15) | 0.0029 (11)  | 0.0227 (12) | 0.0157 (11)  |
| C29 | 0.0318 (11) | 0.0271 (11) | 0.0277 (10) | -0.0095 (8)  | 0.0199 (9)  | -0.0064 (9)  |
| C30 | 0.0620 (17) | 0.0345 (13) | 0.0558 (16) | -0.0153 (12) | 0.0411 (14) | -0.0178 (12) |
| C31 | 0.0223 (10) | 0.0408 (12) | 0.0187 (9)  | -0.0089 (9)  | 0.0100 (8)  | -0.0002 (9)  |
| C32 | 0.0256 (12) | 0.079 (2)   | 0.0265 (12) | -0.0163 (12) | 0.0056 (10) | 0.0005 (12)  |
| C33 | 0.0294 (11) | 0.0321 (11) | 0.0188 (9)  | 0.0004 (8)   | 0.0122 (8)  | 0.0043 (9)   |
| C34 | 0.0619 (17) | 0.0457 (15) | 0.0296 (12) | 0.0132 (11)  | 0.0242 (12) | 0.0173 (13)  |
| C35 | 0.0342 (13) | 0.0472 (15) | 0.0499 (15) | 0.0020 (12)  | 0.0251 (12) | -0.0087 (11) |
| C36 | 0.0465 (13) | 0.0216 (10) | 0.0258 (10) | 0.0003 (8)   | 0.0126 (10) | -0.0007 (10) |
| C37 | 0.0260 (11) | 0.0357 (12) | 0.0208 (10) | 0.0037 (9)   | 0.0001 (8)  | 0.0060 (9)   |
| C38 | 0.0517 (16) | 0.0403 (14) | 0.0404 (14) | 0.0106 (11)  | 0.0075 (12) | 0.0151 (12)  |
| C39 | 0.0249 (10) | 0.0353 (12) | 0.0158 (9)  | 0.0003 (8)   | 0.0011 (8)  | -0.0021 (9)  |
| C40 | 0.0417 (13) | 0.0434 (14) | 0.0210 (10) | 0.0010 (9)   | 0.0110 (10) | -0.0080 (11) |
| C41 | 0.0214 (10) | 0.0325 (11) | 0.0181 (9)  | -0.0053 (8)  | 0.0012 (8)  | -0.0034 (8)  |
| C42 | 0.0338 (12) | 0.0400 (13) | 0.0294 (11) | -0.0114 (10) | 0.0082 (10) | -0.0010 (10) |
| C43 | 0.0202 (10) | 0.0385 (12) | 0.0234 (10) | -0.0054 (9)  | 0.0008 (8)  | -0.0074 (9)  |
| C44 | 0.0337 (13) | 0.0509 (16) | 0.0410 (14) | -0.0084 (12) | 0.0086 (11) | -0.0216 (12) |
| C45 | 0.0181 (10) | 0.0495 (14) | 0.0227 (10) | -0.0033 (9)  | -0.0020 (8) | 0.0026 (9)   |

---

Table S6 - Bond Distances (Angstrom) for **2**:

|        |             |         |        |
|--------|-------------|---------|--------|
| Zr1-O1 | 1.9407 (14) | Zr2-H16 | 1.8600 |
| Zr1-O2 | 1.9790 (15) | Zr3-H27 | 1.9100 |
| Zr1-N1 | 2.0569 (17) | Zr3-H45 | 1.9300 |

|         |             |         |           |
|---------|-------------|---------|-----------|
| Zr1-N2  | 2.0621 (19) | N1-C1   | 1.446 (3) |
| Zr2-O1  | 1.9966 (14) | N1-C2   | 1.449 (3) |
| Zr2-C5  | 2.600 (2)   | N2-C3   | 1.445 (3) |
| Zr2-C6  | 2.576 (2)   | N2-C4   | 1.450 (3) |
| Zr2-C8  | 2.540 (2)   | C5-C6   | 1.406 (3) |
| Zr2-C9  | 2.583 (2)   | C5-C11  | 1.418 (3) |
| Zr2-C11 | 2.584 (2)   | C5-C14  | 1.500 (3) |
| Zr2-C15 | 2.289 (2)   | C6-C8   | 1.418 (3) |
| Zr2-C16 | 2.5812 (19) | C6-C7   | 1.494 (3) |
| Zr2-C17 | 2.541 (2)   | C8-C9   | 1.425 (3) |
| Zr2-C18 | 2.559 (2)   | C8-C13  | 1.506 (3) |
| Zr2-C19 | 2.591 (2)   | C9-C10  | 1.502 (3) |
| Zr2-C20 | 2.6092 (19) | C9-C11  | 1.402 (3) |
| Zr3-O2  | 1.9708 (15) | C11-C12 | 1.504 (4) |
| Zr3-C26 | 2.594 (2)   | C16-C20 | 1.424 (3) |
| Zr3-C27 | 2.607 (2)   | C16-C25 | 1.513 (3) |
| Zr3-C29 | 2.558 (2)   | C16-C17 | 1.416 (3) |
| Zr3-C31 | 2.563 (2)   | C17-C24 | 1.505 (3) |
| Zr3-C33 | 2.585 (2)   | C17-C18 | 1.416 (3) |
| Zr3-C36 | 2.309 (2)   | C18-C19 | 1.419 (3) |
| Zr3-C37 | 2.561 (2)   | C18-C23 | 1.499 (3) |
| Zr3-C39 | 2.585 (2)   | C19-C20 | 1.413 (3) |
| Zr3-C41 | 2.589 (2)   | C19-C22 | 1.503 (3) |
| Zr3-C43 | 2.591 (2)   | C20-C21 | 1.503 (3) |
| Zr3-C45 | 2.611 (2)   | C26-C33 | 1.412 (3) |
| C26-C27 | 1.413 (3)   | C4-H4A  | 0.9600    |
| C26-C35 | 1.504 (4)   | C4-H4B  | 0.9600    |
| C27-C28 | 1.503 (4)   | C4-H4C  | 0.9600    |
| C27-C29 | 1.414 (3)   | C7-H7A  | 0.9600    |
| C29-C31 | 1.408 (3)   | C7-H7B  | 0.9600    |

|         |           |          |        |
|---------|-----------|----------|--------|
| C29-C30 | 1.510 (3) | C7-H7C   | 0.9600 |
| C31-C32 | 1.497 (3) | C10-H10A | 0.9600 |
| C31-C33 | 1.414 (3) | C10-H10B | 0.9600 |
| C33-C34 | 1.499 (3) | C10-H10C | 0.9600 |
| C37-C38 | 1.506 (3) | C12-H12A | 0.9600 |
| C37-C39 | 1.417 (3) | C12-H12B | 0.9600 |
| C37-C45 | 1.421 (3) | C12-H12C | 0.9600 |
| C39-C40 | 1.494 (4) | C13-H13A | 0.9600 |
| C39-C41 | 1.416 (3) | C13-H13B | 0.9600 |
| C41-C43 | 1.419 (3) | C13-H13C | 0.9600 |
| C41-C42 | 1.495 (3) | C14-H14A | 0.9600 |

-----  
Table S7 - Bond Angles (Degrees) for **2**:  
-----

|            |            |            |            |
|------------|------------|------------|------------|
| O1-Zr1-O2  | 111.74 (6) | C6-Zr2-C9  | 52.73 (7)  |
| O1-Zr1-N1  | 108.97 (7) | C6-Zr2-C11 | 52.52 (7)  |
| O1-Zr1-N2  | 108.91 (7) | C6-Zr2-C15 | 102.86 (7) |
| O2-Zr1-N1  | 110.25 (7) | C6-Zr2-C16 | 125.03 (7) |
| O2-Zr1-N2  | 109.44 (7) | C6-Zr2-C17 | 134.96 (7) |
| N1-Zr1-N2  | 107.43 (7) | C6-Zr2-C18 | 162.22 (7) |
| O1-Zr2-C5  | 100.20 (6) | C6-Zr2-C19 | 164.84 (7) |
| O1-Zr2-C6  | 79.95 (6)  | C6-Zr2-C20 | 137.21 (7) |
| O1-Zr2-C8  | 94.54 (6)  | C8-Zr2-C9  | 32.29 (7)  |
| O1-Zr2-C9  | 126.73 (6) | C8-Zr2-C11 | 53.02 (7)  |
| O1-Zr2-C11 | 130.74 (6) | C8-Zr2-C15 | 130.10 (7) |
| O1-Zr2-C15 | 95.11 (7)  | C8-Zr2-C16 | 93.10 (7)  |
| O1-Zr2-C16 | 110.08 (6) | C8-Zr2-C17 | 110.35 (7) |
| O1-Zr2-C17 | 81.59 (6)  | C8-Zr2-C18 | 142.40 (6) |
| O1-Zr2-C18 | 84.65 (6)  | C8-Zr2-C19 | 139.76 (7) |
| O1-Zr2-C19 | 115.19 (6) | C8-Zr2-C20 | 108.24 (7) |

|            |            |             |            |
|------------|------------|-------------|------------|
| O1-Zr2-C20 | 133.66 (6) | C9-Zr2-C11  | 31.49 (7)  |
| C5-Zr2-C6  | 31.52 (7)  | C9-Zr2-C15  | 116.06 (8) |
| C5-Zr2-C8  | 52.89 (7)  | C9-Zr2-C16  | 84.13 (7)  |
| C5-Zr2-C9  | 52.35 (7)  | C9-Zr2-C17  | 113.26 (7) |
| C5-Zr2-C11 | 31.75 (7)  | C9-Zr2-C18  | 135.29 (7) |
| C5-Zr2-C15 | 77.22 (7)  | C9-Zr2-C19  | 113.74 (7) |
| C5-Zr2-C16 | 136.36 (7) | C9-Zr2-C20  | 84.69 (7)  |
| C5-Zr2-C17 | 163.15 (7) | C11-Zr2-C15 | 84.93 (8)  |

---

Table S8 - Torsion Angles (Degrees) (continued) for **2**:

---

|                |              |
|----------------|--------------|
| C15-Zr2-C5-C6  | 143.76 (14)  |
| C15-Zr2-C5-C11 | -101.22 (13) |
| C15-Zr2-C5-C14 | 19.5 (2)     |
| C16-Zr2-C5-C6  | -83.17 (15)  |
| C16-Zr2-C5-C11 | 31.86 (17)   |
| C16-Zr2-C5-C14 | 152.59 (18)  |
| C19-Zr2-C5-C6  | -163.52 (12) |
| C19-Zr2-C5-C11 | -48.49 (17)  |
| C19-Zr2-C5-C14 | 72.2 (2)     |
| C20-Zr2-C5-C6  | -123.63 (13) |
| C20-Zr2-C5-C11 | -8.60 (16)   |
| C20-Zr2-C5-C14 | 112.1 (2)    |
| O1-Zr2-C6-C5   | -129.25 (13) |
| O1-Zr2-C6-C7   | -6.29 (18)   |
| O1-Zr2-C6-C8   | 115.63 (13)  |
| C5-Zr2-C6-C7   | 123.0 (2)    |
| C5-Zr2-C6-C8   | -115.11 (18) |
| C8-Zr2-C6-C5   | 115.11 (18)  |
| C8-Zr2-C6-C7   | -121.9 (2)   |

|               |              |
|---------------|--------------|
| C9-Zr2-C6-C5  | 76.86 (14)   |
| C9-Zr2-C6-C7  | -160.2 (2)   |
| C9-Zr2-C6-C8  | -38.26 (12)  |
| C11-Zr2-C6-C5 | 36.93 (12)   |
| C11-Zr2-C6-C7 | 159.9 (2)    |
| C11-Zr2-C6-C8 | -78.19 (13)  |
| C15-Zr2-C6-C5 | -36.26 (14)  |
| C15-Zr2-C6-C7 | 86.71 (19)   |
| C15-Zr2-C6-C8 | -151.37 (12) |

---

### Atomic co-ordinates of the optimized structures:

#### 2:

|    |          |          |          |
|----|----------|----------|----------|
| Zr | -0.04989 | -1.48975 | 0.47034  |
| Zr | -3.50702 | 0.38182  | -0.31469 |
| Zr | 3.60426  | 0.02094  | -0.05319 |
| O  | -1.75762 | -0.51785 | 0.13350  |
| O  | 1.68491  | -0.47495 | 0.20276  |
| N  | -0.00153 | -2.17964 | 2.42251  |
| N  | 0.00198  | -3.18555 | -0.74417 |
| C  | -1.07546 | -2.00414 | 3.42871  |
| H  | -1.49804 | -2.98189 | 3.75710  |
| H  | -1.89616 | -1.39780 | 3.00515  |
| H  | -0.69627 | -1.48087 | 4.33706  |
| C  | 1.14835  | -2.93877 | 2.97249  |
| H  | 1.52819  | -2.47560 | 3.91139  |
| H  | 1.98681  | -2.95855 | 2.24980  |
| H  | 0.86831  | -3.99220 | 3.20581  |
| C  | -0.62669 | -3.25116 | -2.08702 |
| H  | 0.11666  | -3.47419 | -2.88622 |
| H  | -1.11783 | -2.29151 | -2.33720 |
| H  | -1.40193 | -4.05160 | -2.13113 |
| C  | 0.58428  | -4.49546 | -0.36356 |
| H  | -0.20004 | -5.28646 | -0.30485 |
| H  | 1.07419  | -4.43465 | 0.62512  |
| H  | 1.34834  | -4.83788 | -1.09922 |
| C  | -4.87178 | -1.74525 | -1.21284 |
| C  | -4.45771 | -2.03693 | 0.14136  |
| C  | -3.58627 | -3.22218 | 0.56974  |
| H  | -4.15767 | -4.14617 | 0.50077  |
| H  | -3.25622 | -3.10936 | 1.59643  |
| H  | -2.70893 | -3.32306 | -0.06165 |



|   |          |          |          |
|---|----------|----------|----------|
| C | -5.16623 | -1.13165 | 1.03414  |
| C | -6.06098 | -0.31772 | 0.22051  |
| C | -7.27101 | 0.45874  | 0.75320  |
| H | -7.64178 | 1.16863  | 0.02289  |
| H | -7.04779 | 0.98901  | 1.67181  |
| H | -8.07275 | -0.24647 | 0.96693  |
| C | -5.84799 | -0.66628 | -1.16696 |
| C | -6.67611 | -0.16108 | -2.35575 |
| H | -7.58213 | -0.75542 | -2.46290 |
| H | -6.11439 | -0.23610 | -3.28102 |
| H | -6.97086 | 0.87475  | -2.21963 |
| C | -5.23384 | -1.26285 | 2.56347  |
| H | -5.90299 | -2.07640 | 2.83854  |
| H | -5.61276 | -0.35367 | 3.01718  |
| H | -4.25926 | -1.47692 | 2.99019  |
| C | -4.57068 | -2.61369 | -2.43883 |
| H | -3.57581 | -3.04149 | -2.38538 |
| H | -4.65255 | -2.04428 | -3.35830 |
| H | -5.28650 | -3.43308 | -2.48548 |
| C | -3.05465 | 0.40656  | -2.56043 |
| H | -2.15360 | 1.02152  | -2.74888 |
| H | -3.87733 | 0.78463  | -3.19941 |
| H | -2.82830 | -0.63386 | -2.86653 |
| C | -3.89029 | 2.43187  | 1.32464  |
| C | -2.45871 | 2.29389  | 1.12349  |
| C | -2.15864 | 2.63018  | -0.25246 |
| C | -3.40474 | 2.98392  | -0.90910 |
| C | -4.47367 | 2.87118  | 0.06428  |
| C | -5.87899 | 3.44706  | -0.15479 |
| H | -5.81155 | 4.52782  | -0.26514 |
| H | -6.52790 | 3.23920  | 0.68763  |
| H | -6.34298 | 3.05341  | -1.05460 |
| C | -3.56236 | 3.62339  | -2.29339 |
| H | -4.50385 | 3.33746  | -2.75212 |
| H | -2.75653 | 3.33363  | -2.95848 |
| H | -3.55035 | 4.70823  | -2.19877 |
| C | -0.75095 | 2.75615  | -0.84327 |
| H | -0.78530 | 2.76155  | -1.92710 |
| H | -0.11617 | 1.93503  | -0.52351 |
| H | -0.28923 | 3.68645  | -0.51702 |
| C | -1.42573 | 2.00448  | 2.21624  |
| H | -1.04548 | 2.93598  | 2.63234  |
| H | -0.58463 | 1.44876  | 1.81495  |
| H | -1.86048 | 1.42850  | 3.02683  |
| C | -4.56522 | 2.44755  | 2.70336  |
| H | -4.18044 | 1.65998  | 3.34370  |
| H | -5.63982 | 2.33128  | 2.62459  |
| H | -4.36921 | 3.39941  | 3.19419  |
| C | 5.53267  | 0.95149  | 1.60768  |
| C | 4.89427  | 2.12500  | 1.05167  |
| C | 5.60793  | 3.34614  | 0.45889  |
| H | 5.74295  | 4.08732  | 1.24506  |
| H | 5.03384  | 3.81232  | -0.33443 |

|   |         |          |          |
|---|---------|----------|----------|
| H | 6.58799 | 3.08998  | 0.07456  |
| C | 3.50540 | 2.13361  | 1.49184  |
| C | 2.52896 | 3.30207  | 1.29358  |
| H | 1.50029 | 2.96796  | 1.37186  |
| H | 2.66373 | 3.76597  | 0.32155  |
| H | 2.69291 | 4.06586  | 2.05225  |
| C | 3.31662 | 1.00973  | 2.39372  |
| C | 2.08211 | 0.74987  | 3.26561  |
| H | 1.54178 | 1.67527  | 3.43664  |
| H | 2.38658 | 0.35593  | 4.23052  |
| H | 1.40082 | 0.03524  | 2.81100  |
| C | 4.55780 | 0.26994  | 2.44798  |
| C | 4.89238 | -0.84094 | 3.45040  |
| H | 5.66652 | -1.49764 | 3.06824  |
| H | 4.01890 | -1.44019 | 3.68436  |
| H | 5.25485 | -0.39638 | 4.37631  |
| C | 7.02363 | 0.59458  | 1.53775  |
| H | 7.53338 | 0.92623  | 2.44080  |
| H | 7.50376 | 1.07158  | 0.69021  |
| H | 7.16560 | -0.47864 | 1.45059  |
| C | 4.37642 | -2.07374 | 0.49643  |
| H | 3.95021 | -2.36124 | 1.47758  |
| H | 5.48078 | -2.13775 | 0.57288  |
| H | 4.03455 | -2.80867 | -0.25662 |
| C | 3.68407 | 1.26522  | -2.37205 |
| C | 3.25540 | 2.71631  | -2.63953 |
| H | 3.19058 | 2.89488  | -3.71153 |
| H | 3.96864 | 3.42200  | -2.22909 |
| H | 2.28123 | 2.92727  | -2.20879 |
| C | 2.82740 | 0.10652  | -2.56523 |
| C | 1.35448 | 0.12613  | -2.98018 |
| H | 0.78729 | -0.63170 | -2.44863 |
| H | 1.26398 | -0.07856 | -4.04557 |
| H | 0.90470 | 1.09268  | -2.78441 |
| C | 3.64282 | -1.08210 | -2.47207 |
| C | 3.14444 | -2.50008 | -2.77161 |
| H | 3.92023 | -3.23355 | -2.58280 |
| H | 2.85541 | -2.57631 | -3.81820 |
| H | 2.28005 | -2.74832 | -2.16389 |
| C | 5.01611 | -0.66881 | -2.23598 |
| C | 6.25753 | -1.56899 | -2.25917 |
| H | 6.65910 | -1.62405 | -3.26993 |
| H | 6.01916 | -2.57618 | -1.93505 |
| H | 7.03592 | -1.17746 | -1.61126 |
| C | 5.04905 | 0.77856  | -2.20672 |
| C | 6.33877 | 1.59742  | -2.34459 |
| H | 7.08442 | 1.31293  | -1.60877 |
| H | 6.14791 | 2.65976  | -2.25175 |
| H | 6.76660 | 1.42164  | -3.33008 |

**2a:**

|    |          |          |          |
|----|----------|----------|----------|
| Zr | -0.10953 | -1.50657 | 0.39329  |
| Zr | -3.56849 | 0.38577  | -0.31410 |
| Zr | 3.53338  | 0.04963  | -0.05528 |
| O  | -1.84577 | -0.52337 | 0.07862  |
| O  | 1.59722  | -0.47459 | 0.17889  |
| N  | -0.06710 | -2.29337 | 2.30238  |
| N  | -0.03427 | -3.15178 | -0.89654 |
| C  | -1.14887 | -2.17670 | 3.31035  |
| H  | -1.55718 | -3.17420 | 3.58863  |
| H  | -1.97753 | -1.56027 | 2.91599  |
| H  | -0.77841 | -1.69483 | 4.24288  |
| C  | 1.09289  | -3.06175 | 2.82170  |
| H  | 1.45763  | -2.63972 | 3.78369  |
| H  | 1.93701  | -3.03510 | 2.10633  |
| H  | 0.82349  | -4.12687 | 3.00079  |
| C  | -0.63522 | -3.15987 | -2.25444 |
| H  | 0.12593  | -3.34678 | -3.04362 |
| H  | -1.12606 | -2.19243 | -2.47657 |
| H  | -1.40246 | -3.96193 | -2.34725 |
| C  | 0.56336  | -4.46983 | -0.56617 |
| H  | -0.21166 | -5.26962 | -0.55304 |
| H  | 1.04165  | -4.44806 | 0.42898  |
| H  | 1.33743  | -4.76686 | -1.30830 |
| C  | -4.73958 | -1.58374 | -1.38319 |
| C  | -4.47716 | -1.99273 | -0.01923 |
| C  | -3.64215 | -3.20316 | 0.40590  |
| H  | -4.20816 | -4.11562 | 0.22741  |
| H  | -3.40361 | -3.15598 | 1.46265  |
| H  | -2.71433 | -3.26698 | -0.15454 |
| C  | -5.25777 | -1.13751 | 0.86943  |
| C  | -6.06913 | -0.25446 | 0.03184  |
| C  | -7.31689 | 0.49970  | 0.49927  |
| H  | -7.60559 | 1.26980  | -0.20675 |
| H  | -7.18286 | 0.94893  | 1.47646  |
| H  | -8.13744 | -0.21252 | 0.57141  |
| C  | -5.70719 | -0.48690 | -1.35092 |
| C  | -6.39781 | 0.12945  | -2.57576 |
| H  | -7.28877 | -0.44376 | -2.82531 |
| H  | -5.74221 | 0.12219  | -3.44126 |
| H  | -6.70201 | 1.15363  | -2.38361 |
| C  | -5.43991 | -1.35297 | 2.37812  |
| H  | -6.13347 | -2.17515 | 2.54498  |
| H  | -5.84894 | -0.46774 | 2.85256  |
| H  | -4.50131 | -1.60319 | 2.86206  |
| C  | -4.29830 | -2.34071 | -2.64161 |
| H  | -3.31995 | -2.79025 | -2.50983 |
| H  | -4.26774 | -1.68846 | -3.50901 |
| H  | -5.01060 | -3.13809 | -2.84529 |
| C  | -4.04566 | 2.34600  | 1.28386  |
| C  | -2.59764 | 2.23810  | 1.16598  |
| C  | -2.23044 | 2.55415  | -0.20128 |

|   |          |          |          |
|---|----------|----------|----------|
| C | -3.45136 | 2.85652  | -0.93889 |
| C | -4.56985 | 2.74730  | -0.01951 |
| C | -5.97014 | 3.29102  | -0.32554 |
| H | -5.90807 | 4.36993  | -0.45502 |
| H | -6.65794 | 3.09080  | 0.48727  |
| H | -6.37791 | 2.87122  | -1.24056 |
| C | -3.54407 | 3.43998  | -2.35526 |
| H | -4.45428 | 3.12014  | -2.85440 |
| H | -2.69429 | 3.14575  | -2.96349 |
| H | -3.55750 | 4.52669  | -2.29725 |
| C | -0.79653 | 2.68141  | -0.72684 |
| H | -0.77754 | 2.66565  | -1.81174 |
| H | -0.16968 | 1.87533  | -0.35681 |
| H | -0.36478 | 3.62396  | -0.39644 |
| C | -1.61649 | 1.96875  | 2.30870  |
| H | -1.27419 | 2.91200  | 2.73076  |
| H | -0.74824 | 1.42414  | 1.95255  |
| H | -2.08436 | 1.39413  | 3.10163  |
| C | -4.79624 | 2.37104  | 2.62071  |
| H | -4.42688 | 1.60745  | 3.29812  |
| H | -5.86207 | 2.22995  | 2.48443  |
| H | -4.64403 | 3.33971  | 3.09359  |
| C | 5.45827  | 0.86636  | 1.61936  |
| C | 4.82102  | 2.07605  | 1.14101  |
| C | 5.53608  | 3.32578  | 0.61403  |
| H | 5.68387  | 4.01672  | 1.44243  |
| H | 4.95688  | 3.84222  | -0.14365 |
| H | 6.51043  | 3.08686  | 0.20503  |
| C | 3.43764  | 2.06587  | 1.59499  |
| C | 2.46464  | 3.24764  | 1.47218  |
| H | 1.43523  | 2.91381  | 1.54105  |
| H | 2.59341  | 3.76622  | 0.52721  |
| H | 2.63788  | 3.96644  | 2.27158  |
| C | 3.25315  | 0.89258  | 2.43376  |
| C | 2.02955  | 0.59391  | 3.30905  |
| H | 1.50031  | 1.51262  | 3.54072  |
| H | 2.34514  | 0.14490  | 4.24585  |
| H | 1.33509  | -0.08957 | 2.82753  |
| C | 4.49099  | 0.14327  | 2.43168  |
| C | 4.83358  | -1.02079 | 3.36851  |
| H | 5.60036  | -1.65833 | 2.94170  |
| H | 3.96104  | -1.62883 | 3.58231  |
| H | 5.20994  | -0.62628 | 4.31128  |
| C | 6.94616  | 0.50779  | 1.51303  |
| H | 7.46479  | 0.78536  | 2.42901  |
| H | 7.41979  | 1.03142  | 0.68975  |
| H | 7.08200  | -0.55927 | 1.36319  |
| C | 4.30952  | -2.06683 | 0.37483  |
| H | 3.88911  | -2.40983 | 1.34069  |
| H | 5.41331  | -2.13175 | 0.44452  |
| H | 3.96952  | -2.76082 | -0.41707 |
| C | 3.60236  | 1.41985  | -2.29745 |
| C | 3.16921  | 2.88203  | -2.48548 |

|   |         |          |          |
|---|---------|----------|----------|
| H | 3.10415 | 3.11863  | -3.54620 |
| H | 3.88078 | 3.56605  | -2.03744 |
| H | 2.19492 | 3.06767  | -2.04355 |
| C | 2.75189 | 0.26928  | -2.55404 |
| C | 1.27917 | 0.30642  | -2.96955 |
| H | 0.71466 | -0.48223 | -2.48048 |
| H | 1.18883 | 0.16009  | -4.04469 |
| H | 0.82740 | 1.26047  | -2.72207 |
| C | 3.57319 | -0.92071 | -2.52778 |
| C | 3.08547 | -2.32200 | -2.91197 |
| H | 3.86640 | -3.05942 | -2.76479 |
| H | 2.80013 | -2.33853 | -3.96225 |
| H | 2.22224 | -2.61295 | -2.32222 |
| C | 4.94292 | -0.51492 | -2.26683 |
| C | 6.18860 | -1.40554 | -2.34132 |
| H | 6.58834 | -1.39952 | -3.35416 |
| H | 5.95612 | -2.43096 | -2.07519 |
| H | 6.96509 | -1.04649 | -1.67277 |
| C | 4.96853 | 0.92974  | -2.15812 |
| C | 6.25424 | 1.76005  | -2.25170 |
| H | 7.00121 | 1.43804  | -1.53299 |
| H | 6.05944 | 2.81510  | -2.10169 |
| H | 6.68049 | 1.63809  | -3.24586 |

**2b:**

|    |          |          |          |
|----|----------|----------|----------|
| Zr | -0.11345 | 1.24415  | 0.71874  |
| Zr | -3.64550 | -0.16673 | 0.17088  |
| Zr | 3.62885  | 0.09324  | -0.06928 |
| O  | -1.65725 | 0.09422  | 0.66066  |
| O  | 1.62768  | 0.55634  | 0.26069  |
| N  | -0.07616 | 2.39087  | 2.40484  |
| C  | -1.20568 | 2.50015  | 3.37506  |
| H  | -0.89894 | 2.12235  | 4.37259  |
| H  | -2.07401 | 1.90711  | 3.03655  |
| H  | -1.52241 | 3.55720  | 3.49351  |
| C  | 1.12247  | 3.15357  | 2.86131  |
| H  | 0.88433  | 4.23413  | 2.94840  |
| H  | 1.95958  | 3.04064  | 2.14811  |
| H  | 1.46532  | 2.79849  | 3.85528  |
| C  | -4.05414 | 2.46770  | -0.33942 |
| C  | -2.97035 | 2.01632  | -1.18612 |
| C  | -1.56001 | 2.62516  | -1.22359 |
| H  | -1.48015 | 3.41634  | -1.97076 |
| H  | -0.80697 | 1.88191  | -1.51214 |
| H  | -1.30356 | 3.10211  | -0.27085 |
| C  | -3.48634 | 1.04759  | -2.14094 |
| C  | -4.91605 | 0.92695  | -1.89624 |
| C  | -5.95803 | 0.34399  | -2.85887 |
| H  | -6.73783 | -0.19701 | -2.33464 |
| H  | -5.50280 | -0.31563 | -3.58740 |
| H  | -6.43021 | 1.16323  | -3.39820 |
| C  | -5.25537 | 1.77161  | -0.76285 |

|   |          |          |          |
|---|----------|----------|----------|
| C | -6.68271 | 2.04707  | -0.27387 |
| H | -7.18409 | 2.72972  | -0.95789 |
| H | -6.67583 | 2.49844  | 0.71237  |
| H | -7.26563 | 1.13214  | -0.22806 |
| C | -2.71751 | 0.51992  | -3.36054 |
| H | -2.60933 | 1.30859  | -4.10304 |
| H | -3.24485 | -0.30463 | -3.82630 |
| H | -1.72314 | 0.17636  | -3.08945 |
| C | -3.99686 | 3.65613  | 0.62694  |
| H | -3.03719 | 3.72132  | 1.13071  |
| H | -4.77319 | 3.58909  | 1.38099  |
| H | -4.14874 | 4.57995  | 0.07098  |
| C | -4.48624 | 0.55962  | 2.16220  |
| H | -4.00227 | -0.00797 | 2.98240  |
| H | -5.58137 | 0.41327  | 2.25033  |
| H | -4.28273 | 1.63585  | 2.31518  |
| C | -4.24813 | -2.46857 | -0.96964 |
| C | -2.95524 | -2.59103 | -0.32120 |
| C | -3.16233 | -2.50461 | 1.11590  |
| C | -4.58010 | -2.32649 | 1.35759  |
| C | -5.25095 | -2.26967 | 0.06946  |
| C | -6.77615 | -2.29032 | -0.10037 |
| H | -7.16436 | -3.26323 | 0.19534  |
| H | -7.06243 | -2.11674 | -1.13089 |
| H | -7.25278 | -1.53874 | 0.52277  |
| C | -5.29448 | -2.47811 | 2.70357  |
| H | -6.18429 | -1.85919 | 2.75392  |
| H | -4.64344 | -2.21699 | 3.53075  |
| H | -5.59780 | -3.51681 | 2.82554  |
| C | -2.08323 | -2.73616 | 2.17820  |
| H | -2.33367 | -2.23309 | 3.10710  |
| H | -1.12541 | -2.36456 | 1.83334  |
| H | -1.98020 | -3.80003 | 2.38577  |
| C | -1.62321 | -2.93751 | -1.00093 |
| H | -1.33694 | -3.96012 | -0.76311 |
| H | -0.82709 | -2.28035 | -0.66286 |
| H | -1.70558 | -2.85280 | -2.07959 |
| C | -4.52752 | -2.84633 | -2.42957 |
| H | -3.78080 | -2.44246 | -3.10502 |
| H | -5.50500 | -2.50648 | -2.74796 |
| H | -4.50602 | -3.93099 | -2.52010 |
| C | 4.76054  | 1.28613  | -2.14154 |
| C | 5.12722  | -0.11383 | -2.24119 |
| C | 6.57814  | -0.59879 | -2.37358 |
| H | 7.05553  | -0.07770 | -3.20049 |
| H | 6.61786  | -1.66176 | -2.58157 |
| H | 7.15906  | -0.39843 | -1.47778 |
| C | 3.91161  | -0.88174 | -2.48506 |
| C | 3.82371  | -2.33061 | -2.98384 |
| H | 2.98040  | -2.85808 | -2.54895 |
| H | 4.72818  | -2.88239 | -2.76013 |
| H | 3.69251  | -2.32871 | -4.06444 |
| C | 2.80240  | 0.05477  | -2.53477 |

|   |         |          |          |
|---|---------|----------|----------|
| C | 1.37266 | -0.31895 | -2.94265 |
| H | 1.27363 | -0.29969 | -4.02673 |
| H | 0.65116 | 0.37922  | -2.53025 |
| H | 1.11644 | -1.31673 | -2.60041 |
| C | 3.32325 | 1.39161  | -2.31992 |
| C | 2.54435 | 2.70878  | -2.45401 |
| H | 2.62787 | 3.32290  | -1.56098 |
| H | 1.49383 | 2.51587  | -2.64551 |
| H | 2.93270 | 3.28614  | -3.29000 |
| C | 5.76385 | 2.44410  | -2.13626 |
| H | 6.21098 | 2.53529  | -3.12482 |
| H | 6.56263 | 2.27497  | -1.42037 |
| H | 5.27791 | 3.38354  | -1.89615 |
| C | 4.39752 | 2.08166  | 0.76702  |
| H | 4.15948 | 2.93219  | 0.10025  |
| H | 5.48897 | 2.09739  | 0.95764  |
| H | 3.89471 | 2.24944  | 1.74116  |
| C | 4.80801 | -2.12754 | 0.73961  |
| C | 5.53088 | -3.24777 | -0.01721 |
| H | 5.93966 | -3.94909 | 0.70835  |
| H | 6.35263 | -2.87373 | -0.61688 |
| H | 4.84953 | -3.79461 | -0.65803 |
| C | 3.40950 | -2.17027 | 1.14410  |
| C | 2.41110 | -3.27028 | 0.75322  |
| H | 1.39189 | -2.96012 | 0.95391  |
| H | 2.60662 | -4.17398 | 1.32776  |
| H | 2.48948 | -3.52245 | -0.29944 |
| C | 3.21645 | -1.16023 | 2.17504  |
| C | 1.97457 | -0.97537 | 3.05423  |
| H | 1.73169 | 0.07612  | 3.18571  |
| H | 2.15218 | -1.39945 | 4.04087  |
| H | 1.11576 | -1.47856 | 2.62632  |
| C | 4.47807 | -0.47998 | 2.38006  |
| C | 4.80223 | 0.46683  | 3.53952  |
| H | 5.11177 | -0.12048 | 4.40280  |
| H | 3.93624 | 1.05458  | 3.82644  |
| H | 5.61119 | 1.14278  | 3.28287  |
| C | 5.45796 | -1.06052 | 1.47996  |
| C | 6.96153 | -0.75024 | 1.50924  |
| H | 7.17004 | 0.27126  | 1.20135  |
| H | 7.50594 | -1.42468 | 0.85723  |
| H | 7.34243 | -0.87702 | 2.51994  |

**2c:**

|    |          |          |          |
|----|----------|----------|----------|
| Zr | 0.04418  | 1.45365  | 0.22659  |
| Zr | 3.59628  | -0.37082 | 0.00153  |
| Zr | -3.57421 | -0.26595 | -0.03493 |
| O  | 1.77852  | 0.39530  | 0.24072  |
| O  | -1.72749 | 0.42476  | -0.04161 |
| N  | -0.24840 | 2.58559  | 1.90213  |
| N  | 0.28933  | 2.78148  | -1.33177 |
| C  | 0.47476  | 2.60069  | 3.19990  |

|   |          |          |          |
|---|----------|----------|----------|
| H | 0.94283  | 3.58913  | 3.39020  |
| H | 1.26727  | 1.83030  | 3.21328  |
| H | -0.21634 | 2.39105  | 4.04399  |
| C | -1.38632 | 3.55211  | 1.88339  |
| H | -2.09962 | 3.34946  | 2.70931  |
| H | -1.94341 | 3.49257  | 0.92607  |
| H | -1.02599 | 4.59617  | 1.99497  |
| C | 0.66007  | 2.25836  | -2.67807 |
| H | -0.10115 | 2.51878  | -3.44356 |
| H | 0.76325  | 1.15390  | -2.66235 |
| H | 1.62769  | 2.68269  | -3.02092 |
| C | 0.19665  | 4.26715  | -1.33155 |
| H | 1.16312  | 4.72232  | -1.63732 |
| H | -0.04654 | 4.64300  | -0.32329 |
| H | -0.57935 | 4.63007  | -2.03880 |
| C | 4.91286  | 1.72409  | -0.67515 |
| C | 4.37157  | 1.98948  | 0.64500  |
| C | 3.47115  | 3.17366  | 1.00053  |
| H | 4.05504  | 4.09163  | 0.96313  |
| H | 3.07084  | 3.07024  | 2.00204  |
| H | 2.64658  | 3.27208  | 0.30014  |
| C | 4.99480  | 1.06196  | 1.57665  |
| C | 5.97382  | 0.26314  | 0.83732  |
| C | 7.06947  | -0.58738 | 1.48929  |
| H | 7.48097  | -1.30983 | 0.79337  |
| H | 6.69966  | -1.11339 | 2.36350  |
| H | 7.87734  | 0.06871  | 1.80958  |
| C | 5.92120  | 0.67385  | -0.55579 |
| C | 6.95333  | 0.36412  | -1.64622 |
| H | 7.62603  | 1.21522  | -1.73754 |
| H | 6.48428  | 0.20567  | -2.61291 |
| H | 7.54685  | -0.50708 | -1.39564 |
| C | 4.85461  | 1.08329  | 3.10691  |
| H | 5.58616  | 1.77032  | 3.52868  |
| H | 5.03427  | 0.10011  | 3.53117  |
| H | 3.86645  | 1.41604  | 3.40794  |
| C | 4.68762  | 2.58265  | -1.92693 |
| H | 3.73667  | 3.10199  | -1.87544 |
| H | 4.71230  | 1.98153  | -2.83125 |
| H | 5.47787  | 3.32814  | -1.99778 |
| C | 4.19416  | -2.87072 | 0.33194  |
| C | 2.73717  | -2.72444 | 0.36375  |
| C | 2.29237  | -2.32495 | -0.95456 |
| C | 3.47369  | -2.18679 | -1.80468 |
| C | 4.63762  | -2.58230 | -1.02112 |
| C | 6.00796  | -2.93790 | -1.60223 |
| H | 5.99428  | -3.98898 | -1.88727 |
| H | 6.80265  | -2.79942 | -0.87765 |
| H | 6.23097  | -2.35415 | -2.48829 |
| C | 3.46733  | -1.94723 | -3.32260 |
| H | 4.39488  | -1.48801 | -3.65009 |
| H | 2.64221  | -1.30620 | -3.61730 |
| H | 3.36006  | -2.89772 | -3.84227 |



|   |          |          |          |
|---|----------|----------|----------|
| C | 0.83497  | -2.22767 | -1.41408 |
| H | 0.75226  | -1.64639 | -2.32684 |
| H | 0.21370  | -1.76795 | -0.65104 |
| H | 0.44661  | -3.22518 | -1.61279 |
| C | 1.84248  | -3.12890 | 1.54208  |
| H | 1.54954  | -4.17227 | 1.43833  |
| H | 0.94319  | -2.52445 | 1.57472  |
| H | 2.36700  | -3.02052 | 2.48635  |
| C | 5.02435  | -3.54447 | 1.43299  |
| H | 4.76342  | -3.16970 | 2.41847  |
| H | 6.08554  | -3.39158 | 1.27266  |
| H | 4.83165  | -4.61579 | 1.41940  |
| C | -5.22005 | -1.10509 | 1.83985  |
| C | -4.67618 | -2.28838 | 1.20074  |
| C | -5.46779 | -3.48284 | 0.65537  |
| H | -5.56151 | -4.23130 | 1.44047  |
| H | -4.96385 | -3.94508 | -0.18783 |
| H | -6.46619 | -3.19261 | 0.34941  |
| C | -3.23384 | -2.30771 | 1.45038  |
| C | -2.31040 | -3.49150 | 1.12870  |
| H | -1.27616 | -3.17403 | 1.05888  |
| H | -2.59174 | -3.96807 | 0.19443  |
| H | -2.38363 | -4.23567 | 1.91991  |
| C | -2.89797 | -1.15433 | 2.26529  |
| C | -1.54047 | -0.88221 | 2.91596  |
| H | -0.72713 | -1.09980 | 2.23041  |
| H | -1.41898 | -1.51434 | 3.79409  |
| H | -1.46130 | 0.15316  | 3.22980  |
| C | -4.11451 | -0.38488 | 2.46926  |
| C | -4.28767 | 0.81680  | 3.40970  |
| H | -5.07176 | 1.48051  | 3.05751  |
| H | -3.36682 | 1.38310  | 3.49962  |
| H | -4.56673 | 0.46373  | 4.40096  |
| C | -6.69733 | -0.80710 | 2.11809  |
| H | -6.91387 | -1.06224 | 3.15402  |
| H | -7.34626 | -1.39958 | 1.48401  |
| H | -6.93216 | 0.24390  | 1.97876  |
| C | -4.73459 | -0.84596 | -2.26054 |
| C | -4.85721 | -2.21845 | -2.93819 |
| H | -5.23617 | -2.08925 | -3.95051 |
| H | -5.54667 | -2.86066 | -2.40061 |
| H | -3.89471 | -2.71733 | -3.00198 |
| C | -3.67643 | 0.13364  | -2.53047 |
| C | -2.49144 | -0.08675 | -3.47761 |
| H | -1.65955 | 0.55616  | -3.21306 |
| H | -2.79131 | 0.14817  | -4.49754 |
| H | -2.15774 | -1.11972 | -3.45608 |
| C | -4.04764 | 1.38132  | -1.90416 |
| C | -3.32808 | 2.72281  | -2.07597 |
| H | -3.62447 | 3.42465  | -1.30334 |
| H | -3.59106 | 3.15378  | -3.04031 |
| H | -2.25091 | 2.59913  | -2.03943 |
| C | -5.33353 | 1.18340  | -1.22757 |

|   |          |          |          |
|---|----------|----------|----------|
| C | -6.19095 | 2.29819  | -0.60919 |
| H | -6.75123 | 2.80415  | -1.39344 |
| H | -5.57477 | 3.03722  | -0.10616 |
| H | -6.90132 | 1.89618  | 0.10575  |
| C | -5.78378 | -0.17006 | -1.51625 |
| C | -7.21414 | -0.68414 | -1.34243 |
| H | -7.72690 | -0.17619 | -0.53382 |
| H | -7.24361 | -1.75357 | -1.16637 |
| H | -7.75927 | -0.48284 | -2.26358 |

**2d:**

|    |          |          |          |
|----|----------|----------|----------|
| Zr | -0.09022 | 1.08070  | 0.98542  |
| Zr | -3.60000 | -0.19387 | 0.09158  |
| Zr | 3.55922  | -0.08670 | -0.17383 |
| O  | -1.56530 | -0.06055 | 0.67400  |
| O  | 1.73126  | 0.52921  | 0.37264  |
| N  | -0.08249 | 1.70232  | 2.91441  |
| C  | -1.11830 | 1.44247  | 3.95751  |
| H  | -0.68226 | 0.87176  | 4.80200  |
| H  | -1.95533 | 0.85886  | 3.53939  |
| H  | -1.51682 | 2.39559  | 4.35917  |
| C  | 1.06218  | 2.50645  | 3.44414  |
| H  | 0.71259  | 3.50085  | 3.78639  |
| H  | 1.83571  | 2.66496  | 2.66546  |
| H  | 1.53984  | 1.99740  | 4.30489  |
| C  | -3.99767 | 2.47303  | 0.18127  |
| C  | -2.91015 | 2.22184  | -0.74157 |
| C  | -1.50895 | 2.84358  | -0.64306 |
| H  | -1.44283 | 3.79357  | -1.17849 |
| H  | -0.74336 | 2.20167  | -1.10726 |
| H  | -1.25111 | 3.09978  | 0.40058  |
| C  | -3.41329 | 1.48937  | -1.89140 |
| C  | -4.84418 | 1.31995  | -1.68768 |
| C  | -5.86251 | 0.97604  | -2.78055 |
| H  | -6.77939 | 0.57966  | -2.35907 |
| H  | -5.46804 | 0.26320  | -3.49514 |
| H  | -6.11083 | 1.88809  | -3.32098 |
| C  | -5.19371 | 1.89305  | -0.39561 |
| C  | -6.62032 | 2.06889  | 0.13804  |
| H  | -7.05716 | 2.97745  | -0.27299 |
| H  | -6.62596 | 2.14833  | 1.22015  |
| H  | -7.25083 | 1.23311  | -0.14820 |
| C  | -2.64448 | 1.26217  | -3.20058 |
| H  | -2.53627 | 2.20414  | -3.73568 |
| H  | -3.17575 | 0.57241  | -3.84648 |
| H  | -1.65021 | 0.86231  | -3.02019 |
| C  | -3.93921 | 3.40920  | 1.39314  |
| H  | -3.03865 | 3.25814  | 1.98146  |
| H  | -4.79654 | 3.26024  | 2.03999  |
| H  | -3.95091 | 4.44306  | 1.05174  |
| C  | -4.44212 | 0.08231  | 2.18590  |
| H  | -4.03693 | -0.70506 | 2.85134  |

|   |          |          |          |
|---|----------|----------|----------|
| H | -5.54695 | 0.01673  | 2.23012  |
| H | -4.16060 | 1.07191  | 2.59508  |
| C | -3.88101 | -2.21206 | -1.53850 |
| C | -2.79290 | -2.52307 | -0.63392 |
| C | -3.34021 | -2.67780 | 0.70561  |
| C | -4.77439 | -2.47293 | 0.62950  |
| C | -5.11032 | -2.16235 | -0.75111 |
| C | -6.54573 | -2.14799 | -1.29353 |
| H | -6.95763 | -3.15384 | -1.23714 |
| H | -6.57341 | -1.83271 | -2.32991 |
| H | -7.18769 | -1.49298 | -0.71135 |
| C | -5.80299 | -2.80024 | 1.71549  |
| H | -6.68130 | -2.16850 | 1.62875  |
| H | -5.38677 | -2.68121 | 2.70969  |
| H | -6.11841 | -3.83602 | 1.59977  |
| C | -2.55407 | -3.16522 | 1.92896  |
| H | -3.08788 | -2.94502 | 2.84741  |
| H | -1.57711 | -2.69445 | 1.97811  |
| H | -2.40888 | -4.24272 | 1.87255  |
| C | -1.34363 | -2.81730 | -1.03726 |
| H | -1.20007 | -3.88994 | -1.15585 |
| H | -0.65396 | -2.46625 | -0.27609 |
| H | -1.09420 | -2.33907 | -1.97930 |
| C | -3.78836 | -2.27593 | -3.06798 |
| H | -2.85216 | -1.86409 | -3.43062 |
| H | -4.60716 | -1.74692 | -3.54134 |
| H | -3.83966 | -3.31714 | -3.38194 |
| C | 5.49195  | 0.72082  | -1.76862 |
| C | 4.40621  | 0.18911  | -2.57689 |
| C | 4.53831  | -0.88128 | -3.66987 |
| H | 4.74736  | -0.39812 | -4.62278 |
| H | 3.62264  | -1.45528 | -3.77808 |
| H | 5.35300  | -1.56354 | -3.45223 |
| C | 3.24647  | 1.07175  | -2.40183 |
| C | 1.96385  | 1.01100  | -3.24116 |
| H | 1.12045  | 1.42943  | -2.70211 |
| H | 1.72631  | -0.01064 | -3.52235 |
| H | 2.10016  | 1.58821  | -4.15433 |
| C | 3.60536  | 2.10283  | -1.45336 |
| C | 2.77045  | 3.33844  | -1.09903 |
| H | 1.70826  | 3.12649  | -1.17053 |
| H | 2.99708  | 4.14334  | -1.79651 |
| H | 2.99236  | 3.69196  | -0.09656 |
| C | 4.98238  | 1.86124  | -1.01757 |
| C | 5.83171  | 2.82764  | -0.17855 |
| H | 6.64660  | 2.30734  | 0.31442  |
| H | 5.23161  | 3.32738  | 0.57561  |
| H | 6.26125  | 3.58892  | -0.82759 |
| C | 6.97048  | 0.35579  | -1.91175 |
| H | 7.38858  | 0.95698  | -2.71814 |
| H | 7.10596  | -0.68843 | -2.16957 |
| H | 7.52729  | 0.57628  | -1.00792 |
| C | 3.55068  | -2.54291 | 0.49663  |

|   |         |          |          |
|---|---------|----------|----------|
| C | 2.74245 | -3.65930 | -0.18091 |
| H | 2.96783 | -4.60898 | 0.30134  |
| H | 2.99876 | -3.74763 | -1.23233 |
| H | 1.67549 | -3.48215 | -0.09489 |
| C | 3.15012 | -1.78726 | 1.67578  |
| C | 1.83662 | -1.94640 | 2.44485  |
| H | 1.55740 | -1.02122 | 2.94104  |
| H | 1.95284 | -2.71379 | 3.20853  |
| H | 1.03087 | -2.25027 | 1.78432  |
| C | 4.28515 | -0.98257 | 2.09504  |
| C | 4.38433 | -0.16595 | 3.39103  |
| H | 5.07461 | 0.66503  | 3.28042  |
| H | 4.75339 | -0.80586 | 4.19080  |
| H | 3.41486 | 0.22046  | 3.68794  |
| C | 5.40468 | -1.26596 | 1.19810  |
| C | 6.85700 | -0.86907 | 1.48939  |
| H | 7.21572 | -1.45577 | 2.33340  |
| H | 6.94362 | 0.18107  | 1.75226  |
| H | 7.49937 | -1.07416 | 0.64107  |
| C | 4.95142 | -2.24009 | 0.21501  |
| C | 5.83439 | -3.06169 | -0.73030 |
| H | 6.76472 | -2.55136 | -0.95073 |
| H | 5.32461 | -3.28484 | -1.66230 |
| H | 6.07556 | -4.00651 | -0.24568 |

---

## Reference.

- (S1) J.-S. Ryu, G. Y. Li and T. J. Marks, *J. Am. Chem. Soc.*, 2003, **125**, 12584–12605.
- (S2) C. Brinkmann, A. G. M. Barrett, M. S. Hill and P. A. Procopiou, *J. Am. Chem. Soc.*, 2012, **134**, 2193–2207.
- (S3) R. D. S. Y. Seo and T. J. Marks, *Chem. Eur. J.*, 2010, **16**, 5148–5162.
- (S4) M. Gómez-Gallego and M. A. Sierra, *Chem. Rev.*, 2011, **111**, 4857–4963.
